# Supplementary material for: A new practical isobaric interference correction model for thein situHf isotopic analysis using laser ablation-multi-collector-ICP-mass spectrometry of zircons with high Yb/Hf ratios
Source: Royal Society of Chemistry journal article supplement (doi:10.1039/c9ja00024k), 2019-01-01
Supplement: c9ja00024k1.xlsx [file c9ja00024k1.xlsx]

## Sheet: 1
Appendix 1 Compiled results of measurement to JMC-475
Solution	176Hfa	177Hfa	178Hfa	179Hfa	180Hfa	176Hf/177Hf	SE
Unit	V	V	V	V	V
JMC-475	0.726511	2.59532	3.83812	1.93123	5.01326	0.282158	5e-06
JMC-475	0.739408	2.64132	3.90606	1.96535	5.10172	0.282156	4e-06
JMC-475	0.312537	1.116	1.64961	0.829705	2.15301	0.282142	4e-06
JMC-475	0.922879	3.29783	4.87835	2.45539	6.37584	0.282151	3e-06
JMC-475	0.691644	2.47587	3.66905	1.85003	4.81261	0.282163	5e-06
JMC-475	0.760056	2.7181	4.024	2.02696	5.26753	0.282155	4e-06
JMC-475	0.709633	2.535	3.74898	1.88639	4.89687	0.282162	1.3e-05
a Ion intensity of specified isotope.
