# Supplementary material for: A new practical isobaric interference correction model for thein situHf isotopic analysis using laser ablation-multi-collector-ICP-mass spectrometry of zircons with high Yb/Hf ratios
Source: Royal Society of Chemistry journal article supplement (doi:10.1039/c9ja00024k), 2019-01-01
Supplement: c9ja00024k2.xlsx [file c9ja00024k2.xlsx]

## Sheet: S1
Appendix 2 Results of solution experiments
Solution	172Ybf	173Ybf	175Luf	176Hff	177Hff	178Hff	179Hff	180Hff	176Hf/177Hf a	SE	βYbm b	βHf	βYbm/βHf	βYbc c	(βYb/βHf)c	βYbc/βYbm	176Hf/177Hf d	ε d	176Hf/177Hf e	ε e
Unit	V	V	V	V	V	V	V	V
HFUT-Hf	-	-	-	0.5644	2.0183	2.9851	1.5021	3.8998	0.281906	5e-06	-	-	-	-	-	-	-	-	-	-
Yb-1	0.3688	0.2746	-	-	-	-	-	-	-	-	1.06497	-	-	-	-	-	-	-	-	-
Yb-2	0.2716	0.2022	-	-	-	-	-	-	-	-	1.0592	-	-	-	-	-	-	-	-	-
Yb-3	0.2207	0.1643	-	-	-	-	-	-	-	-	1.05475	-	-	-	-	-	-	-	-	-
Yb-4	0.0833	0.062	-	-	-	-	-	-	-	-	1.08796	-	-	-	-	-	-	-	-	-
Yb-5	0.0356	0.0265	-	-	-	-	-	-	-	-	1.17567	-	-	-	-	-	-	-	-	-
Yb-6	0.0194	0.0145	-	-	-	-	-	-	-	-	1.22753	-	-	-	-	-	-	-	-	-
Yb-7	0.0085	0.0063	-	-	-	-	-	-	-	-	1.26646	-	-	-	-	-	-	-	-	-
Hf-Yb-1	0.4912	0.3657	-	0.8983	2.1489	3.1781	1.5992	4.1517	0.282263	5e-06	-1.05252	-1.409	0.747	-1.226	0.871	1.166	0.281904	-0.1	0.280918	-35
Hf-Yb-2	0.402	0.2993	-	0.735	1.7579	2.5999	1.3083	3.3963	0.282269	4e-06	-1.05816	-1.409	0.751	-1.229	0.872	1.16	0.281911	0.2	0.280924	-34.8
Hf-Yb-3	0.1843	0.1372	-	0.6695	1.9953	2.9509	1.4849	3.8549	0.282055	4e-06	-1.06943	-1.409	0.759	-1.231	0.874	1.151	0.281911	0.2	0.281512	-14
Hf-Yb-4	0.0838	0.0624	-	0.6074	1.9905	2.944	1.4814	3.8458	0.281977	5e-06	-1.11452	-1.409	0.791	-1.237	0.877	1.109	0.281912	0.2	0.28173	-6.2
Hf-Yb-5	0.0394	0.0293	-	0.5872	2.0144	2.9792	1.4991	3.8918	0.281938	5e-06	-1.16125	-1.411	0.823	-1.236	0.876	1.064	0.281908	0.1	0.281824	-2.9
Hf-Yb-6	0.0192	0.0143	-	0.555	1.9428	2.8734	1.4459	3.7536	0.281927	6e-06	-1.33293	-1.412	0.944	-1.27	0.9	0.953	0.281912	0.2	0.281869	-1.3
Hf-Yb-7	0.0103	0.0077	-	0.5583	1.9742	2.9198	1.4693	3.8143	0.281937	5e-06	-1.40593	-1.413	0.995	-1.538	1.088	1.093	0.281929	0.8	0.281906	0
a. The 176Hf/177Hf ratios are calculated with Evaluation program, by assuming βLu=βYb=βHf.
b. Mass bias of Yb from direct measured from MC-ICP-MS.
c. Mass bias of Yb calculated using our proposed model.
d. The 176Hf/177Hf ratios are calculated using the (βYb/βHf)c=0.871, ε values are to 176Hf/177Hf ratio of the pure Hf solution (HFUT-Hf, 0.281906).
e. The 176Hf/177Hf ratios are calculated using the (βYb/βHf)c=1.088, ε values are to 176Hf/177Hf ratio of the pure Hf solution (HFUT-Hf, 0.281906).
f. Ion intensity of the specified isotope.
