# Supplementary material for: A new practical isobaric interference correction model for thein situHf isotopic analysis using laser ablation-multi-collector-ICP-mass spectrometry of zircons with high Yb/Hf ratios
Source: Royal Society of Chemistry journal article supplement (doi:10.1039/c9ja00024k), 2019-01-01
Supplement: c9ja00024k3.xlsx [file c9ja00024k3.xlsx]

## Sheet: Analyicial sequence
Spot No	Standard Zircon
1	Qinghu
2	91500
3	GJ-1
4	Penglai
5	Plesovice
6	Temora-2
7	Qinghu
8	91500
9	GJ-1
10	Penglai
11	Plesovice
12	Temora-2
13	Qinghu
14	91500
15	GJ-1
16	Penglai
17	Plesovice
18	Temora-2
19	Qinghu
20	91500
21	GJ-1
22	Penglai
23	Plesovice
24	Temora-2
25	Qinghu
26	91500
27	GJ-1
28	Penglai
29	Plesovice
30	Temora-2
31	Qinghu

## Sheet: Std-Plesovice
Sample	176Hf/177Hf	2SE	βHf	βYb	HfBeam	YbBeam	LuBeam	176Yb/177Hf	176Lu/177Hf	2SE	(βYb/βHf)c	εRef.Value
PLE	0.282481	1.65306e-05	-1.31011	-0.912373	15.7938	0.11799	0.00996926	0.00527388	8.82608e-05	8.43197e-07	0.696409	-0.029198
PLE	0.282498	1.99205e-05	-1.31933	-0.918791	15.3899	0.116492	0.0098385	0.00534747	8.94597e-05	5.77561e-07	0.696409	0.572237
PLE	0.282472	1.78888e-05	-1.32361	-0.921774	15.8467	0.123333	0.0103151	0.00549824	9.10428e-05	7.45503e-07	0.696409	-0.364677
PLE	0.282488	1.98812e-05	-1.29696	-0.903214	17.4091	0.141328	0.0123637	0.00570858	9.94473e-05	7.34673e-07	0.696409	0.208789
PLE	0.282472	2.08212e-05	-1.32999	-0.926217	15.9401	0.129833	0.0107736	0.0057557	9.4584e-05	6.56093e-07	0.696409	-0.34717
GJ-1	0.282083	2.12884e-05	-1.28329	-0.893694	10.2433	0.132646	0.0174486	0.00910249	0.000238561	1.01432e-06	0.696409	2.95956
GJ-1	0.282059	2.48443e-05	-1.29591	-0.902481	10.2331	0.134865	0.0173959	0.00927658	0.000238052	1.11833e-06	0.696409	2.08796
GJ-1	0.282079	2.61525e-05	-1.30542	-0.909107	10.0616	0.134397	0.0171222	0.00941112	0.000238306	9.8616e-07	0.696409	2.80368
GJ-1	0.282049	2.32946e-05	-1.31068	-0.912772	9.9678	0.134298	0.0169778	0.00949115	0.000238525	9.83815e-07	0.696409	1.72974
GJ-1	0.282079	2.78988e-05	-1.31754	-0.917544	8.53162	0.121318	0.0145247	0.010027	0.000238411	1.04944e-06	0.696409	2.81227
91500	0.282386	2.56637e-05	-1.28913	-0.89776	8.05079	0.129181	0.0162463	0.0113036	0.000282585	1.04987e-06	0.696409	2.85743
91500	0.28233	2.5761e-05	-1.28111	-0.892177	8.10096	0.132779	0.0169341	0.0115412	0.000292728	1.00874e-06	0.696409	0.869719
91500	0.282346	2.58811e-05	-1.31325	-0.91456	7.8881	0.133854	0.0164249	0.0119549	0.000291628	1.15776e-06	0.696409	1.46165
91500	0.282362	2.92576e-05	-1.2995	-0.904987	7.73277	0.131352	0.0160574	0.0119727	0.000290778	1.07402e-06	0.696409	2.00429
91500	0.282321	2.85543e-05	-1.30541	-0.909101	7.7974	0.133052	0.0162025	0.0120304	0.000291	1.02813e-06	0.696409	0.570335
PENGLAI	0.282964	2.50435e-05	-1.29683	-0.903126	8.40568	0.141527	0.0162496	0.0118522	0.000270732	1.03066e-06	0.696409	2.06513
PENGLAI	0.282976	2.78528e-05	-1.30906	-0.911644	7.85456	0.137603	0.015197	0.0123477	0.000270985	1.04499e-06	0.696409	2.48204
PENGLAI	0.282972	3.12853e-05	-1.3033	-0.907633	7.70319	0.135428	0.0150289	0.012379	0.000273174	1.66954e-06	0.696409	2.33969
PENGLAI	0.282979	2.97592e-05	-1.28807	-0.897023	7.26893	0.129537	0.0140187	0.0125618	0.000270009	1.19284e-06	0.696409	2.57458
PENGLAI	0.282964	3.03223e-05	-1.31951	-0.91892	7.623	0.13843	0.014647	0.012831	0.000269024	1.36738e-06	0.696409	2.05818
QINGHU	0.283174	2.37767e-05	-1.30453	-0.908485	13.3047	0.537081	0.0765641	0.0283237	0.000805722	3.70913e-06	0.696409	6.28951
QINGHU	0.28318	2.60575e-05	-1.32048	-0.919597	11.3559	0.46297	0.0515681	0.0286852	0.000636146	9.66716e-07	0.696409	6.51306
QINGHU	0.283214	2.47519e-05	-1.28274	-0.893315	11.9303	0.505434	0.0557212	0.0298534	0.0006573	1.45929e-05	0.696409	7.70179
QINGHU	0.283209	2.02751e-05	-1.32487	-0.922651	12.1123	0.555774	0.0625012	0.0322743	0.000722782	1.05421e-05	0.696409	7.52387
QINGHU	0.283232	2.36623e-05	-1.31475	-0.915606	11.9216	0.58452	0.0796253	0.0344444	0.000935835	4.71509e-06	0.696409	8.32956
QINGHU	0.283297	2.81839e-05	-1.28448	-0.89452	10.8905	0.733319	0.099073	0.0469542	0.00127105	2.85347e-05	0.696409	10.6196
TEMORA-2	0.282825	2.87998e-05	-1.31539	-0.916048	9.41973	0.392075	0.0528388	0.0292925	0.000784779	8.66915e-06	0.696409	5.21951
TEMORA-2	0.28292	2.52986e-05	-1.30843	-0.911202	11.1175	0.514051	0.0668836	0.0325335	0.000842559	2.36468e-06	0.696409	8.58318
TEMORA-2	0.282941	2.77354e-05	-1.28305	-0.893531	10.0457	0.559381	0.070834	0.0391568	0.000988411	3.82859e-05	0.696409	9.33681
TEMORA-2	0.282957	2.89708e-05	-1.29301	-0.900462	9.20141	0.549296	0.0685908	0.0421728	0.00104594	2.06341e-05	0.696409	9.88885
TEMORA-2	0.28305	2.88194e-05	-1.31154	-0.91337	10.7234	0.80553	0.0962408	0.0528126	0.00125665	1.54119e-05	0.696409	13.2007

## Sheet: Std-GJ-1
Sample	176Hf/177Hf	2SE	βHf	βYb	HfBeam	YbBeam	LuBeam	176Yb/177Hf	176Lu/177Hf	2SE	(βYb/βHf)c	εRef.Value
PLE	0.282448	1.66103e-05	-1.31011	-1.18314	15.7938	0.11799	0.00996926	0.00530687	8.82608e-05	8.43197e-07	0.903087	-1.20594
PLE	0.282464	1.99264e-05	-1.31933	-1.19147	15.3899	0.116492	0.0098385	0.00538116	8.94597e-05	5.77561e-07	0.903087	-0.629405
PLE	0.282437	1.79889e-05	-1.32361	-1.19534	15.8467	0.123333	0.0103151	0.00553299	9.10428e-05	7.45503e-07	0.903087	-1.60425
PLE	0.282452	1.98197e-05	-1.29696	-1.17127	17.4091	0.141328	0.0123637	0.00574394	9.94473e-05	7.34673e-07	0.903087	-1.05202
PLE	0.282435	2.0735e-05	-1.32999	-1.2011	15.9401	0.129833	0.0107736	0.00579226	9.4584e-05	6.56093e-07	0.903087	-1.65111
GJ-1	0.282027	2.12134e-05	-1.28329	-1.15892	10.2433	0.132646	0.0174486	0.00915827	0.000238561	1.01432e-06	0.903087	0.967167
GJ-1	0.282001	2.48482e-05	-1.29591	-1.17032	10.2331	0.134865	0.0173959	0.00933399	0.000238052	1.11833e-06	0.903087	0.0372935
GJ-1	0.28202	2.59248e-05	-1.30542	-1.17891	10.0616	0.134397	0.0171222	0.00946979	0.000238306	9.8616e-07	0.903087	0.707834
GJ-1	0.281989	2.33312e-05	-1.31068	-1.18366	9.9678	0.134298	0.0169778	0.00955056	0.000238525	9.83815e-07	0.903087	-0.392542
GJ-1	0.282016	2.77955e-05	-1.31754	-1.18985	8.53162	0.121318	0.0145247	0.0100901	0.000238411	1.04944e-06	0.903087	0.558334
91500	0.282316	2.55561e-05	-1.28913	-1.1642	8.05079	0.129181	0.0162463	0.0113732	0.000282585	1.04987e-06	0.903087	0.374555
91500	0.282258	2.57736e-05	-1.28111	-1.15695	8.10096	0.132779	0.0169341	0.0116118	0.000292728	1.00874e-06	0.903087	-1.6494
91500	0.282271	2.58259e-05	-1.31325	-1.18598	7.8881	0.133854	0.0164249	0.0120299	0.000291628	1.15776e-06	0.903087	-1.21394
91500	0.282287	2.92558e-05	-1.2995	-1.17357	7.73277	0.131352	0.0160574	0.012047	0.000290778	1.07402e-06	0.903087	-0.646938
91500	0.282246	2.8561e-05	-1.30541	-1.1789	7.7974	0.133052	0.0162025	0.0121054	0.000291	1.02813e-06	0.903087	-2.10591
PENGLAI	0.28289	2.5062e-05	-1.29683	-1.17115	8.40568	0.141527	0.0162496	0.0119256	0.000270732	1.03066e-06	0.903087	-0.548396
PENGLAI	0.282898	2.77474e-05	-1.30906	-1.1822	7.85456	0.137603	0.015197	0.0124249	0.000270985	1.04499e-06	0.903087	-0.266697
PENGLAI	0.282895	3.13041e-05	-1.3033	-1.177	7.70319	0.135428	0.0150289	0.012456	0.000273174	1.66954e-06	0.903087	-0.403763
PENGLAI	0.282901	2.96932e-05	-1.28807	-1.16324	7.26893	0.129537	0.0140187	0.0126391	0.000270009	1.19284e-06	0.903087	-0.176516
PENGLAI	0.282883	3.02766e-05	-1.31951	-1.19163	7.623	0.13843	0.014647	0.0129118	0.000269024	1.36738e-06	0.903087	-0.821183
QINGHU	0.282996	2.36932e-05	-1.30453	-1.1781	13.3047	0.537081	0.0765641	0.0285002	0.000805722	3.70913e-06	0.903087	0.00839541
QINGHU	0.282998	2.54965e-05	-1.32048	-1.19251	11.3559	0.46297	0.0515681	0.028866	0.000636146	9.66716e-07	0.903087	0.0731583
QINGHU	0.28303	2.48361e-05	-1.28274	-1.15843	11.9303	0.505434	0.0557212	0.0300362	0.0006573	1.45929e-05	0.903087	1.19315
QINGHU	0.283003	2.03388e-05	-1.32487	-1.19647	12.1123	0.555774	0.0625012	0.0324785	0.000722782	1.05421e-05	0.903087	0.253888
QINGHU	0.283014	2.34539e-05	-1.31475	-1.18734	11.9216	0.58452	0.0796253	0.0346607	0.000935835	4.71509e-06	0.903087	0.630611
QINGHU	0.283006	2.73645e-05	-1.28448	-1.15999	10.8905	0.733319	0.099073	0.0472422	0.00127105	2.85347e-05	0.903087	0.368701
TEMORA-2	0.282639	2.86949e-05	-1.31539	-1.18791	9.41973	0.392075	0.0528388	0.0294765	0.000784779	8.66915e-06	0.903087	-1.33847
TEMORA-2	0.282715	2.53093e-05	-1.30843	-1.18163	11.1175	0.514051	0.0668836	0.0327368	0.000842559	2.36468e-06	0.903087	1.33853
TEMORA-2	0.282699	2.75502e-05	-1.28305	-1.15871	10.0457	0.559381	0.070834	0.0393967	0.000988411	3.82859e-05	0.903087	0.788119
TEMORA-2	0.282694	2.75549e-05	-1.29301	-1.1677	9.20141	0.549296	0.0685908	0.0424332	0.00104594	2.06341e-05	0.903087	0.609536
TEMORA-2	0.282717	2.88169e-05	-1.31154	-1.18444	10.7234	0.80553	0.0962408	0.0531433	0.00125665	1.54119e-05	0.903087	1.41197

## Sheet: Std-91500
Sample	176Hf/177Hf	2SE	βHf	βYb	HfBeam	YbBeam	LuBeam	176Yb/177Hf	176Lu/177Hf	2SE	(βYb/βHf)c	εRef.Value
PLE	0.282463	1.65742e-05	-1.31011	-1.06363	15.7938	0.11799	0.00996926	0.00529228	8.82608e-05	8.43197e-07	0.811865	-0.685653
PLE	0.282479	1.99227e-05	-1.31933	-1.07112	15.3899	0.116492	0.0098385	0.00536626	8.94597e-05	5.77561e-07	0.811865	-0.0981039
PLE	0.282452	1.79436e-05	-1.32361	-1.07459	15.8467	0.123333	0.0103151	0.00551763	9.10428e-05	7.45503e-07	0.811865	-1.05618
PLE	0.282468	1.98463e-05	-1.29696	-1.05296	17.4091	0.141328	0.0123637	0.00572831	9.94473e-05	7.34673e-07	0.811865	-0.494576
PLE	0.282452	2.07718e-05	-1.32999	-1.07977	15.9401	0.129833	0.0107736	0.00577609	9.4584e-05	6.56093e-07	0.811865	-1.07457
GJ-1	0.282052	2.12446e-05	-1.28329	-1.04186	10.2433	0.132646	0.0174486	0.00913361	0.000238561	1.01432e-06	0.811865	1.84805
GJ-1	0.282027	2.48443e-05	-1.29591	-1.0521	10.2331	0.134865	0.0173959	0.00930861	0.000238052	1.11833e-06	0.811865	0.943961
GJ-1	0.282046	2.60233e-05	-1.30542	-1.05983	10.0616	0.134397	0.0171222	0.00944385	0.000238306	9.8616e-07	0.811865	1.63449
GJ-1	0.282015	2.33123e-05	-1.31068	-1.0641	9.9678	0.134298	0.0169778	0.00952429	0.000238525	9.83815e-07	0.811865	0.545804
GJ-1	0.282044	2.78375e-05	-1.31754	-1.06966	8.53162	0.121318	0.0145247	0.0100622	0.000238411	1.04944e-06	0.811865	1.5549
91500	0.282347	2.56008e-05	-1.28913	-1.0466	8.05079	0.129181	0.0162463	0.0113424	0.000282585	1.04987e-06	0.811865	1.4723
91500	0.28229	2.57654e-05	-1.28111	-1.04009	8.10096	0.132779	0.0169341	0.0115805	0.000292728	1.00874e-06	0.811865	-0.535639
91500	0.282304	2.58468e-05	-1.31325	-1.06618	7.8881	0.133854	0.0164249	0.0119968	0.000291628	1.15776e-06	0.811865	-0.0309471
91500	0.28232	2.92535e-05	-1.2995	-1.05502	7.73277	0.131352	0.0160574	0.0120142	0.000290778	1.07402e-06	0.811865	0.525261
91500	0.282279	2.85549e-05	-1.30541	-1.05982	7.7974	0.133052	0.0162025	0.0120723	0.000291	1.02813e-06	0.811865	-0.922643
PENGLAI	0.282923	2.50503e-05	-1.29683	-1.05285	8.40568	0.141527	0.0162496	0.0118931	0.000270732	1.03066e-06	0.811865	0.60713
PENGLAI	0.282933	2.77896e-05	-1.30906	-1.06278	7.85456	0.137603	0.015197	0.0123907	0.000270985	1.04499e-06	0.811865	0.948629
PENGLAI	0.282929	3.12928e-05	-1.3033	-1.05811	7.70319	0.135428	0.0150289	0.012422	0.000273174	1.66954e-06	0.811865	0.809219
PENGLAI	0.282935	2.9719e-05	-1.28807	-1.04574	7.26893	0.129537	0.0140187	0.0126049	0.000270009	1.19284e-06	0.811865	1.03982
PENGLAI	0.282919	3.02904e-05	-1.31951	-1.07127	7.623	0.13843	0.014647	0.0128761	0.000269024	1.36738e-06	0.811865	0.451916
QINGHU	0.283075	2.37208e-05	-1.30453	-1.0591	13.3047	0.537081	0.0765641	0.0284221	0.000805722	3.70913e-06	0.811865	2.78551
QINGHU	0.283079	2.57311e-05	-1.32048	-1.07205	11.3559	0.46297	0.0515681	0.0287861	0.000636146	9.66716e-07	0.811865	2.92054
QINGHU	0.283111	2.4789e-05	-1.28274	-1.04142	11.9303	0.505434	0.0557212	0.0299554	0.0006573	1.45929e-05	0.811865	4.07078
QINGHU	0.283094	2.02885e-05	-1.32487	-1.07562	12.1123	0.555774	0.0625012	0.0323882	0.000722782	1.05421e-05	0.811865	3.46831
QINGHU	0.28311	2.35398e-05	-1.31475	-1.0674	11.9216	0.58452	0.0796253	0.034565	0.000935835	4.71509e-06	0.811865	4.03465
QINGHU	0.283135	2.76006e-05	-1.28448	-1.04282	10.8905	0.733319	0.099073	0.0471149	0.00127105	2.85347e-05	0.811865	4.9009
TEMORA-2	0.282721	2.87371e-05	-1.31539	-1.06792	9.41973	0.392075	0.0528388	0.0293951	0.000784779	8.66915e-06	0.811865	1.5611
TEMORA-2	0.282805	2.529e-05	-1.30843	-1.06227	11.1175	0.514051	0.0668836	0.0326469	0.000842559	2.36468e-06	0.811865	4.54168
TEMORA-2	0.282806	2.76051e-05	-1.28305	-1.04167	10.0457	0.559381	0.070834	0.0392906	0.000988411	3.82859e-05	0.811865	4.56771
TEMORA-2	0.28281	2.79199e-05	-1.29301	-1.04975	9.20141	0.549296	0.0685908	0.0423181	0.00104594	2.06341e-05	0.811865	4.71221
TEMORA-2	0.282864	2.88141e-05	-1.31154	-1.0648	10.7234	0.80553	0.0962408	0.0529971	0.00125665	1.54119e-05	0.811865	6.62425

## Sheet: Std-Penglai
Sample	176Hf/177Hf	2SE	βHf	βYb	HfBeam	YbBeam	LuBeam	176Yb/177Hf	176Lu/177Hf	2SE	(βYb/βHf)c	εRef.Value
PLE	0.282452	1.65998e-05	-1.31011	-1.14899	15.7938	0.11799	0.00996926	0.0053027	8.82608e-05	8.43197e-07	0.877016	-1.05709
PLE	0.282469	1.99252e-05	-1.31933	-1.15707	15.3899	0.116492	0.0098385	0.0053769	8.94597e-05	5.77561e-07	0.877016	-0.477407
PLE	0.282441	1.79758e-05	-1.32361	-1.16083	15.8467	0.123333	0.0103151	0.0055286	9.10428e-05	7.45503e-07	0.877016	-1.44746
PLE	0.282457	1.98272e-05	-1.29696	-1.13745	17.4091	0.141328	0.0123637	0.00573946	9.94473e-05	7.34673e-07	0.877016	-0.892548
PLE	0.28244	2.07453e-05	-1.32999	-1.16642	15.9401	0.129833	0.0107736	0.00578763	9.4584e-05	6.56093e-07	0.877016	-1.48617
GJ-1	0.282034	2.1222e-05	-1.28329	-1.12546	10.2433	0.132646	0.0174486	0.00915121	0.000238561	1.01432e-06	0.877016	1.21917
GJ-1	0.282008	2.48467e-05	-1.29591	-1.13653	10.2331	0.134865	0.0173959	0.00932673	0.000238052	1.11833e-06	0.877016	0.296673
GJ-1	0.282027	2.59526e-05	-1.30542	-1.14487	10.0616	0.134397	0.0171222	0.00946237	0.000238306	9.8616e-07	0.877016	0.972933
GJ-1	0.281997	2.33254e-05	-1.31068	-1.14949	9.9678	0.134298	0.0169778	0.00954304	0.000238525	9.83815e-07	0.877016	-0.124096
GJ-1	0.282024	2.78069e-05	-1.31754	-1.1555	8.53162	0.121318	0.0145247	0.0100821	0.000238411	1.04944e-06	0.877016	0.843437
91500	0.282324	2.55684e-05	-1.28913	-1.13059	8.05079	0.129181	0.0162463	0.0113644	0.000282585	1.04987e-06	0.877016	0.688599
91500	0.282267	2.57708e-05	-1.28111	-1.12355	8.10096	0.132779	0.0169341	0.0116028	0.000292728	1.00874e-06	0.877016	-1.33078
91500	0.28228	2.58313e-05	-1.31325	-1.15174	7.8881	0.133854	0.0164249	0.0120204	0.000291628	1.15776e-06	0.877016	-0.875504
91500	0.282296	2.92546e-05	-1.2995	-1.13969	7.73277	0.131352	0.0160574	0.0120376	0.000290778	1.07402e-06	0.877016	-0.311594
91500	0.282255	2.85587e-05	-1.30541	-1.14487	7.7974	0.133052	0.0162025	0.0120959	0.000291	1.02813e-06	0.877016	-1.7674
PENGLAI	0.2829	2.50581e-05	-1.29683	-1.13734	8.40568	0.141527	0.0162496	0.0119163	0.000270732	1.03066e-06	0.877016	-0.217822
PENGLAI	0.282908	2.77588e-05	-1.30906	-1.14807	7.85456	0.137603	0.015197	0.0124151	0.000270985	1.04499e-06	0.877016	0.0809877
PENGLAI	0.282904	3.13004e-05	-1.3033	-1.14302	7.70319	0.135428	0.0150289	0.0124463	0.000273174	1.66954e-06	0.877016	-0.0567505
PENGLAI	0.282911	2.97e-05	-1.28807	-1.12966	7.26893	0.129537	0.0140187	0.0126293	0.000270009	1.19284e-06	0.877016	0.171452
PENGLAI	0.282893	3.02795e-05	-1.31951	-1.15723	7.623	0.13843	0.014647	0.0129016	0.000269024	1.36738e-06	0.877016	-0.456967
QINGHU	0.283019	2.36996e-05	-1.30453	-1.14409	13.3047	0.537081	0.0765641	0.0284778	0.000805722	3.70913e-06	0.877016	0.802879
QINGHU	0.283021	2.55614e-05	-1.32048	-1.15809	11.3559	0.46297	0.0515681	0.0288432	0.000636146	9.66716e-07	0.877016	0.887754
QINGHU	0.283053	2.4821e-05	-1.28274	-1.12499	11.9303	0.505434	0.0557212	0.0300131	0.0006573	1.45929e-05	0.877016	2.01637
QINGHU	0.283029	2.03208e-05	-1.32487	-1.16193	12.1123	0.555774	0.0625012	0.0324526	0.000722782	1.05421e-05	0.877016	1.17349
QINGHU	0.283041	2.34775e-05	-1.31475	-1.15306	11.9216	0.58452	0.0796253	0.0346333	0.000935835	4.71509e-06	0.877016	1.60445
QINGHU	0.283043	2.74111e-05	-1.28448	-1.12651	10.8905	0.733319	0.099073	0.0472058	0.00127105	2.85347e-05	0.877016	1.66526
TEMORA-2	0.282663	2.87063e-05	-1.31539	-1.15362	9.41973	0.392075	0.0528388	0.0294532	0.000784779	8.66915e-06	0.877016	-0.508948
TEMORA-2	0.282741	2.53014e-05	-1.30843	-1.14751	11.1175	0.514051	0.0668836	0.0327111	0.000842559	2.36468e-06	0.877016	2.2549
TEMORA-2	0.28273	2.75615e-05	-1.28305	-1.12526	10.0457	0.559381	0.070834	0.0393663	0.000988411	3.82859e-05	0.877016	1.86938
TEMORA-2	0.282727	2.76155e-05	-1.29301	-1.13399	9.20141	0.549296	0.0685908	0.0424002	0.00104594	2.06341e-05	0.877016	1.78323
TEMORA-2	0.282759	2.88155e-05	-1.31154	-1.15024	10.7234	0.80553	0.0962408	0.0531015	0.00125665	1.54119e-05	0.877016	2.90312

## Sheet: Std-Qinghu
Sample	176Hf/177Hf	2SE	βHf	βYb	HfBeam	YbBeam	LuBeam	176Yb/177Hf	176Lu/177Hf	2SE	(βYb/βHf)c	εRef.Value
PLE	0.282446	1.6615e-05	-1.31011	-1.19861	15.7938	0.11799	0.00996926	0.00530876	8.82608e-05	8.43197e-07	0.91489	-1.27336
PLE	0.282462	1.9927e-05	-1.31933	-1.20704	15.3899	0.116492	0.0098385	0.00538309	8.94597e-05	5.77561e-07	0.91489	-0.698258
PLE	0.282435	1.79949e-05	-1.32361	-1.21096	15.8467	0.123333	0.0103151	0.00553498	9.10428e-05	7.45503e-07	0.91489	-1.67528
PLE	0.28245	1.98163e-05	-1.29696	-1.18658	17.4091	0.141328	0.0123637	0.00574596	9.94473e-05	7.34673e-07	0.91489	-1.12426
PLE	0.282433	2.07303e-05	-1.32999	-1.2168	15.9401	0.129833	0.0107736	0.00579435	9.4584e-05	6.56093e-07	0.91489	-1.72583
GJ-1	0.282024	2.12096e-05	-1.28329	-1.17407	10.2433	0.132646	0.0174486	0.00916147	0.000238561	1.01432e-06	0.91489	0.853014
GJ-1	0.281998	2.48489e-05	-1.29591	-1.18561	10.2331	0.134865	0.0173959	0.00933728	0.000238052	1.11833e-06	0.91489	-0.0802016
GJ-1	0.282017	2.59124e-05	-1.30542	-1.19432	10.0616	0.134397	0.0171222	0.00947315	0.000238306	9.8616e-07	0.91489	0.587747
GJ-1	0.281986	2.33339e-05	-1.31068	-1.19913	9.9678	0.134298	0.0169778	0.00955396	0.000238525	9.83815e-07	0.91489	-0.514144
GJ-1	0.282012	2.77905e-05	-1.31754	-1.2054	8.53162	0.121318	0.0145247	0.0100937	0.000238411	1.04944e-06	0.91489	0.429185
91500	0.282312	2.55506e-05	-1.28913	-1.17941	8.05079	0.129181	0.0162463	0.0113772	0.000282585	1.04987e-06	0.91489	0.232299
91500	0.282254	2.57749e-05	-1.28111	-1.17208	8.10096	0.132779	0.0169341	0.0116158	0.000292728	1.00874e-06	0.91489	-1.79373
91500	0.28226	2.37995e-05	-1.30956	-1.1981	7.85564	0.130352	0.0163597	0.0117762	0.000291652	1.04621e-06	0.91489	-1.5813
91500	0.282266	2.58235e-05	-1.31325	-1.20148	7.8881	0.133854	0.0164249	0.0120342	0.000291628	1.15776e-06	0.91489	-1.36725
91500	0.282282	2.92565e-05	-1.2995	-1.1889	7.73277	0.131352	0.0160574	0.0120513	0.000290778	1.07402e-06	0.91489	-0.798844
PENGLAI	0.282886	2.50639e-05	-1.29683	-1.18646	8.40568	0.141527	0.0162496	0.0119298	0.000270732	1.03066e-06	0.91489	-0.698141
PENGLAI	0.282894	2.77425e-05	-1.30906	-1.19765	7.85456	0.137603	0.015197	0.0124293	0.000270985	1.04499e-06	0.91489	-0.424194
PENGLAI	0.28289	3.13059e-05	-1.3033	-1.19238	7.70319	0.135428	0.0150289	0.0124604	0.000273174	1.66954e-06	0.91489	-0.560955
PENGLAI	0.282897	2.96902e-05	-1.28807	-1.17844	7.26893	0.129537	0.0140187	0.0126435	0.000270009	1.19284e-06	0.91489	-0.33414
PENGLAI	0.282878	3.02756e-05	-1.31951	-1.20721	7.623	0.13843	0.014647	0.0129165	0.000269024	1.36738e-06	0.91489	-0.986169
QINGHU	0.282986	2.36908e-05	-1.30453	-1.1935	13.3047	0.537081	0.0765641	0.0285103	0.000805722	3.70913e-06	0.91489	-0.351495
QINGHU	0.282988	2.54677e-05	-1.32048	-1.2081	11.3559	0.46297	0.0515681	0.0288764	0.000636146	9.66716e-07	0.91489	-0.295845
QINGHU	0.283019	2.48433e-05	-1.28274	-1.17357	11.9303	0.505434	0.0557212	0.0300467	0.0006573	1.45929e-05	0.91489	0.82024
QINGHU	0.282991	2.03479e-05	-1.32487	-1.21211	12.1123	0.555774	0.0625012	0.0324902	0.000722782	1.05421e-05	0.91489	-0.162683
QINGHU	0.283001	2.34435e-05	-1.31475	-1.20286	11.9216	0.58452	0.0796253	0.034673	0.000935835	4.71509e-06	0.91489	0.189471
QINGHU	0.28299	2.73489e-05	-1.28448	-1.17515	10.8905	0.733319	0.099073	0.0472587	0.00127105	2.85347e-05	0.91489	-0.218618
TEMORA-2	0.282629	2.86899e-05	-1.31539	-1.20344	9.41973	0.392075	0.0528388	0.029487	0.000784779	8.66915e-06	0.91489	-1.71424
TEMORA-2	0.282703	2.53134e-05	-1.30843	-1.19707	11.1175	0.514051	0.0668836	0.0327484	0.000842559	2.36468e-06	0.91489	0.923432
TEMORA-2	0.282685	2.75463e-05	-1.28305	-1.17385	10.0457	0.559381	0.070834	0.0394104	0.000988411	3.82859e-05	0.91489	0.298329
TEMORA-2	0.282679	2.75391e-05	-1.29301	-1.18296	9.20141	0.549296	0.0685908	0.0424481	0.00104594	2.06341e-05	0.91489	0.0778727
TEMORA-2	0.282698	2.88177e-05	-1.31154	-1.19992	10.7234	0.80553	0.0962408	0.0531623	0.00125665	1.54119e-05	0.91489	0.736494

## Sheet: Std-Temora-2
Sample	176Hf/177Hf	2SE	βHf	βYb	HfBeam	YbBeam	LuBeam	176Yb/177Hf	176Lu/177Hf	2SE	(βYb/βHf)c	εRef.Value
PLE	0.282447	1.66125e-05	-1.31011	-1.19046	15.7938	0.11799	0.00996926	0.00530776	8.82608e-05	8.43197e-07	0.908667	-1.23781
PLE	0.282463	1.99267e-05	-1.31933	-1.19883	15.3899	0.116492	0.0098385	0.00538207	8.94597e-05	5.77561e-07	0.908667	-0.661951
PLE	0.282436	1.79917e-05	-1.32361	-1.20272	15.8467	0.123333	0.0103151	0.00553393	9.10428e-05	7.45503e-07	0.908667	-1.63783
PLE	0.282451	1.98181e-05	-1.29696	-1.1785	17.4091	0.141328	0.0123637	0.00574489	9.94473e-05	7.34673e-07	0.908667	-1.08617
PLE	0.282434	2.07328e-05	-1.32999	-1.20852	15.9401	0.129833	0.0107736	0.00579325	9.4584e-05	6.56093e-07	0.908667	-1.68643
GJ-1	0.282026	2.12116e-05	-1.28329	-1.16608	10.2433	0.132646	0.0174486	0.00915978	0.000238561	1.01432e-06	0.908667	0.913208
GJ-1	0.281999	2.48485e-05	-1.29591	-1.17755	10.2331	0.134865	0.0173959	0.00933554	0.000238052	1.11833e-06	0.908667	-0.0182449
GJ-1	0.282018	2.59189e-05	-1.30542	-1.18619	10.0616	0.134397	0.0171222	0.00947137	0.000238306	9.8616e-07	0.908667	0.65107
GJ-1	0.281987	2.33325e-05	-1.31068	-1.19097	9.9678	0.134298	0.0169778	0.00955216	0.000238525	9.83815e-07	0.908667	-0.450022
GJ-1	0.282014	2.77931e-05	-1.31754	-1.1972	8.53162	0.121318	0.0145247	0.0100918	0.000238411	1.04944e-06	0.908667	0.497287
91500	0.282314	2.55535e-05	-1.28913	-1.17139	8.05079	0.129181	0.0162463	0.0113751	0.000282585	1.04987e-06	0.908667	0.307313
91500	0.282257	2.57742e-05	-1.28111	-1.1641	8.10096	0.132779	0.0169341	0.0116137	0.000292728	1.00874e-06	0.908667	-1.71762
91500	0.282266	2.21534e-05	-1.31066	-1.19095	7.72544	0.128681	0.0160822	0.0118408	0.000291468	1.26132e-06	0.908667	-1.37872
91500	0.282269	2.58247e-05	-1.31325	-1.19331	7.8881	0.133854	0.0164249	0.0120319	0.000291628	1.15776e-06	0.908667	-1.28641
91500	0.282285	2.92561e-05	-1.2995	-1.18082	7.73277	0.131352	0.0160574	0.012049	0.000290778	1.07402e-06	0.908667	-0.718742
PENGLAI	0.282888	2.50629e-05	-1.29683	-1.17839	8.40568	0.141527	0.0162496	0.0119276	0.000270732	1.03066e-06	0.908667	-0.619179
PENGLAI	0.282896	2.77451e-05	-1.30906	-1.1895	7.85456	0.137603	0.015197	0.012427	0.000270985	1.04499e-06	0.908667	-0.341144
PENGLAI	0.282892	3.13049e-05	-1.3033	-1.18427	7.70319	0.135428	0.0150289	0.0124581	0.000273174	1.66954e-06	0.908667	-0.478066
PENGLAI	0.282899	2.96918e-05	-1.28807	-1.17043	7.26893	0.129537	0.0140187	0.0126412	0.000270009	1.19284e-06	0.908667	-0.251023
PENGLAI	0.282881	3.02761e-05	-1.31951	-1.199	7.623	0.13843	0.014647	0.012914	0.000269024	1.36738e-06	0.908667	-0.899169
QINGHU	0.282991	2.3692e-05	-1.30453	-1.18538	13.3047	0.537081	0.0765641	0.0285049	0.000805722	3.70913e-06	0.908667	-0.16172
QINGHU	0.282993	2.54828e-05	-1.32048	-1.19988	11.3559	0.46297	0.0515681	0.0288709	0.000636146	9.66716e-07	0.908667	-0.101264
QINGHU	0.283025	2.48395e-05	-1.28274	-1.16559	11.9303	0.505434	0.0557212	0.0300412	0.0006573	1.45929e-05	0.908667	1.01688
QINGHU	0.282998	2.0343e-05	-1.32487	-1.20386	12.1123	0.555774	0.0625012	0.032484	0.000722782	1.05421e-05	0.908667	0.0569807
QINGHU	0.283008	2.3449e-05	-1.31475	-1.19467	11.9216	0.58452	0.0796253	0.0346665	0.000935835	4.71509e-06	0.908667	0.42209
QINGHU	0.282999	2.73567e-05	-1.28448	-1.16716	10.8905	0.733319	0.099073	0.04725	0.00127105	2.85347e-05	0.908667	0.0910827
TEMORA-2	0.282634	2.86925e-05	-1.31539	-1.19525	9.41973	0.392075	0.0528388	0.0294814	0.000784779	8.66915e-06	0.908667	-1.51609
TEMORA-2	0.282709	2.53112e-05	-1.30843	-1.18893	11.1175	0.514051	0.0668836	0.0327423	0.000842559	2.36468e-06	0.908667	1.14232
TEMORA-2	0.282693	2.75483e-05	-1.28305	-1.16587	10.0457	0.559381	0.070834	0.0394032	0.000988411	3.82859e-05	0.908667	0.556601
TEMORA-2	0.282687	2.75465e-05	-1.29301	-1.17491	9.20141	0.549296	0.0685908	0.0424402	0.00104594	2.06341e-05	0.908667	0.358226
TEMORA-2	0.282708	2.88173e-05	-1.31154	-1.19176	10.7234	0.80553	0.0962408	0.0531523	0.00125665	1.54119e-05	0.908667	1.09268
