# Supplementary material for: A new practical isobaric interference correction model for thein situHf isotopic analysis using laser ablation-multi-collector-ICP-mass spectrometry of zircons with high Yb/Hf ratios
Source: Royal Society of Chemistry journal article supplement (doi:10.1039/c9ja00024k), 2019-01-01
Supplement: c9ja00024k4.xlsx [file c9ja00024k4.xlsx]

## Sheet: Sheet1
SpotNo	Sample	εRef.Valuea	εRef.Valuea	εRef.Valueb	εRef.Valueb	εRef.Valuec	εRef.Valuec	εRef.Valued	εRef.Valued	εRef.Valuee	εRef.Valuee
		New Model	Model W	New Model	Model W	New Model	Model W	New Model	Model W	New Model	Model H
1	91500	-0.946861	-2.83642	-0.953309	-1.40132	-0.94435	-3.39646	-0.946861	-2.83642	-0.946861	-144.579
2	91500	-1.61067	1.58422	-1.61239	3.01142	-1.61	1.02727	-1.61067	1.58422	-1.61067	-140.556
3	91500	-0.91515	-2.74575	-0.907299	-1.30532	-0.918206	-3.30786	-0.91515	-2.74575	-0.91515	-147.159
4	91500	0.104567	-0.554692	0.121079	0.805647	0.0981389	-1.08556	0.104567	-0.554692	0.104567	-135.951
5	91500	-1.02872	-0.590715	-1.00515	0.792564	-1.0379	-1.13053	-1.02872	-0.590715	-1.02872	-137.905
6	PENGLAI	-0.595237	-1.0387	-0.612199	0.48575	-0.588634	-1.63361	-0.595237	-1.0387	-0.595237	-152.256
7	PENGLAI	-0.265163	2.47336	-0.268003	3.93683	-0.264058	1.90225	-0.265163	2.47336	-0.265163	-143.274
8	PENGLAI	-0.462227	0.865977	-0.459201	2.34917	-0.463404	0.287172	-0.462227	0.865977	-0.462227	-147.605
9	PENGLAI	-0.426556	-0.96743	-0.416751	0.460329	-0.430373	-1.5246	-0.426556	-0.96743	-0.426556	-143.307
10	PENGLAI	-0.555741	0.95006	-0.530947	2.45094	-0.565393	0.364351	-0.555741	0.95006	-0.555741	-151.686
11	PLESOVICE	-1.51695	-1.25815	-1.53105	-0.568993	-1.51146	-1.5271	-1.51695	-1.25815	-1.51695	-69.7268
12	PLESOVICE	-1.20384	-1.04067	-1.21321	-0.376124	-1.20019	-1.3	-1.20384	-1.04067	-1.20384	-67.4927
13	PLESOVICE	-0.866916	-2.15301	-0.873063	-1.50422	-0.864523	-2.4062	-0.866916	-2.15301	-0.866916	-66.1021
14	PLESOVICE	-1.14362	-1.6684	-1.14637	-1.02005	-1.14254	-1.92141	-1.14362	-1.6684	-1.14362	-65.3887
15	PLESOVICE	-1.33052	-0.370951	-1.32715	0.317701	-1.33184	-0.639693	-1.33052	-0.370951	-1.33052	-69.859
16	QINGHU	-0.00945631	0.0516661	-0.0630385	3.83383	0.0114027	-1.4243	-0.00945631	0.0516661	-0.00945631	-370.334
17	QINGHU	0.0235974	4.4293	-0.012291	7.85411	0.0375686	3.0928	0.0235974	4.4293	0.0235974	-336.275
18	QINGHU	0.500712	0.901639	0.461104	5.05854	0.516131	-0.720566	0.500712	0.901639	0.500712	-410.481
19	QINGHU	-0.876717	0.625965	-0.876664	3.9942	-0.876738	-0.688468	-0.876717	0.625965	-0.876717	-333.815
20	QINGHU	1.00945	2.05689	1.07532	5.82238	0.9838	0.587429	1.00945	2.05689	1.00945	-370.799
21	QINGHU	-0.487341	3.99885	-0.373705	10.05	-0.531582	1.63742	-0.487341	3.99885	-0.487341	-594.03
22	TEMORA-2	0.708916	0.266219	0.685586	6.78447	0.717999	-2.27749	0.708916	0.266219	0.708916	-644.887
23	TEMORA-2	1.62758	1.18504	1.61059	5.10723	1.63419	-0.345571	1.62758	1.18504	1.62758	-389.439
24	TEMORA-2	-1.61689	-1.45152	-1.63052	2.22582	-1.61158	-2.88658	-1.61689	-1.45152	-1.61689	-368.628
25	TEMORA-2	-0.132908	0.319035	-0.0832405	5.26973	-0.152244	-1.61294	-0.132908	0.319035	-0.132908	-497.804
26	TEMORA-2	0.9924	-2.57631	1.08171	2.63942	0.957632	-4.61172	0.9924	-2.57631	0.9924	-518.477
a. Calculation using 172Yb/176Yb=0.58849, (βYb/βHf)c=0.909.
b. Calculation using 172Yb/176Yb=0.5887, (βYb/βHf)c=0.897.
c. Calculation using 172Yb/176Yb=0.59155, (βYb/βHf)c=0.737.
d. Calculation using 172Yb/176Yb=0.59075, (βYb/βHf)c=0.782.
e. Caculation using 173Yb/172Yb=0.73840 from Segal et al. (2013), and the 173Yb/176Yb=0.79381 were used to calculating 176Yb beam with Model H, (βYb/βHf)c=0.916.
