# Supplementary material for: A new practical isobaric interference correction model for thein situHf isotopic analysis using laser ablation-multi-collector-ICP-mass spectrometry of zircons with high Yb/Hf ratios
Source: Royal Society of Chemistry journal article supplement (doi:10.1039/c9ja00024k), 2019-01-01
Supplement: c9ja00024k5.xlsx [file c9ja00024k5.xlsx]

## Sheet: STDs
Sample	SpotTime	176Hf/177Hf	2SE	βHf	βYb	HfBeam	YbBeam	LuBeam	176Yb/177Hf	εRec.Value
91500	2018-10-16 11:12:27	0.282277	2.54974e-05	-1.54753	-1.43314	5.33445	0.13425	0.0124867	0.0180485	-0.982531
91500	2018-10-16 12:17:21	0.282276	1.92239e-05	-1.4845	-1.36336	8.95956	0.205195	0.0210414	0.0163644	-1.02399
91500	2018-10-16 13:13:06	0.282285	1.75101e-05	-1.44166	-1.32112	8.81237	0.198856	0.0207522	0.0161313	-0.72435
91500	2018-10-16 14:26:19	0.28233	1.8704e-05	-1.40113	-1.26437	8.38601	0.179581	0.0194886	0.0152245	0.884425
91500	2018-10-16 14:46:01	0.282301	2.0695e-05	-1.37893	-1.24433	8.03718	0.169651	0.018233	0.0150602	-0.13945
91500	2018-10-16 15:40:11	0.282291	2.13683e-05	-1.36837	-1.23728	7.61574	0.160469	0.0172827	0.0149969	-0.4909
91500	2018-10-16 16:10:19	0.282265	2.0697e-05	-1.34837	-1.2192	7.46499	0.153533	0.0167241	0.0146306	-1.42659
91500	2018-10-16 17:28:37	0.2823	2.19394e-05	-1.33338	-1.21318	6.81366	0.13215	0.0144559	0.0138122	-0.186656
91500	2018-10-16 17:35:19	0.282292	2.26117e-05	-1.32635	-1.2068	6.72831	0.138373	0.0151183	0.0146221	-0.448594
91500	2018-10-16 18:09:54	0.282292	2.17917e-05	-1.33828	-1.20588	6.89583	0.134529	0.0147013	0.013863	-0.462933
91500	2018-10-16 18:16:38	0.282286	2.224e-05	-1.33559	-1.20344	6.81672	0.128245	0.0142111	0.0133358	-0.664651
91500	2018-10-16 20:12:25	0.282262	2.36637e-05	-1.30719	-1.16104	5.70362	0.109726	0.0124364	0.0135926	-1.53261
91500	2018-10-16 20:25:33	0.282352	2.17821e-05	-1.32214	-1.17432	5.70087	0.107645	0.0120653	0.0133577	1.6784
91500	2018-10-17 11:25:41	0.282259	2.21827e-05	-1.52795	-1.41412	6.33434	0.139706	0.013825	0.0157291	-1.61261
91500	2018-10-17 11:48:17	0.282287	2.16893e-05	-1.55352	-1.43778	6.57398	0.137461	0.0143075	0.0148764	-0.646253
91500	2018-10-17 12:06:18	0.282294	2.18312e-05	-1.57072	-1.4537	6.11249	0.133988	0.0137042	0.0156209	-0.38174
91500	2018-10-17 12:15:08	0.282337	2.33538e-05	-1.5803	-1.46257	6.15843	0.126772	0.0130569	0.014671	1.11945
91500	2018-10-17 14:04:28	0.282267	2.33105e-05	-1.54083	-1.4207	5.78809	0.135839	0.0132772	0.0167712	-1.36348
91500	2018-10-17 14:27:23	0.282293	2.44437e-05	-1.59615	-1.47171	5.81124	0.129541	0.0131879	0.0159093	-0.437055
91500	2018-10-17 14:47:15	0.28227	2.761e-05	-1.62604	-1.49927	5.46347	0.124576	0.0126359	0.0163304	-1.25004
91500	2018-10-17 16:45:35	0.282307	2.37861e-05	-1.62558	-1.48778	5.31043	0.119877	0.0120082	0.0161609	0.0850457
91500	2018-10-17 17:12:19	0.282261	2.50221e-05	-1.66309	-1.52212	5.23054	0.115485	0.011816	0.0158437	-1.57061
91500	2018-10-17 18:05:53	0.282263	2.65492e-05	-1.67966	-1.53728	5.14401	0.114459	0.0116967	0.0160033	-1.47422
91500	2018-10-17 19:28:07	0.282323	2.77019e-05	-1.67962	-1.54362	4.96944	0.110908	0.011344	0.0160008	0.642758
91500	2018-10-17 19:54:22	0.282313	2.54933e-05	-1.68689	-1.55029	4.94537	0.105677	0.010814	0.0153502	0.267942
91500	2018-10-17 20:20:36	0.282341	2.70702e-05	-1.69957	-1.56195	5.05063	0.10902	0.0113135	0.0155069	1.29165
91500	2018-10-18 12:38:15	0.282331	3.93269e-05	-1.3762	-1.26291	2.99044	0.0356461	0.0042983	0.00847862	0.909167
91500	2018-10-18 13:45:53	0.282314	2.35974e-05	-1.50929	-1.38923	5.65785	0.149033	0.0141496	0.0187942	0.331547
91500	2018-10-18 14:20:25	0.282316	2.15566e-05	-1.4867	-1.36844	6.1489	0.156774	0.0152683	0.0181387	0.391002
91500	2018-10-18 16:33:37	0.282271	2.83967e-05	-1.4769	-1.35753	5.41637	0.117119	0.0118046	0.0153596	-1.21764
91500	2018-10-18 17:09:02	0.282266	2.30225e-05	-1.47125	-1.35234	5.27948	0.115303	0.0113609	0.0155752	-1.38796
91500	2018-10-18 18:40:28	0.282286	2.45458e-05	-1.51116	-1.39877	5.82065	0.135027	0.0130348	0.0165314	-0.674193
91500	2018-12-25 09:50:14	0.282279	1.89469e-05	-1.31659	-1.19301	7.85769	0.127829	0.0164193	0.0115343	-0.92389
91500	2018-12-25 09:55:45	0.28226	1.96713e-05	-1.31225	-1.18908	7.79464	0.127535	0.0162565	0.0116131	-1.58238
91500	2018-12-25 10:01:16	0.28228	1.96084e-05	-1.30352	-1.18117	7.76443	0.12669	0.0162048	0.0115793	-0.876597
91500	2018-12-25 10:06:47	0.282309	1.97819e-05	-1.29477	-1.17324	8.0457	0.124478	0.0162789	0.0109658	0.150894
91500	2018-12-25 10:12:18	0.282277	1.86719e-05	-1.28841	-1.16748	8.12494	0.128137	0.017021	0.011182	-0.974203
GJ-1	2018-11-20 16:00:01	0.281985	1.28889e-05	-1.08046	-1.00753	12.653	0.183835	0.0244007	0.010225	-0.516498
GJ-1	2018-11-20 16:12:14	0.282005	1.65469e-05	-1.05802	-0.986601	12.1225	0.174583	0.0232029	0.0101264	0.183454
GJ-1	2018-11-20 18:00:35	0.282001	2.07711e-05	-0.95193	-0.865912	9.11545	0.126637	0.0171523	0.00976397	0.0318304
GJ-1	2018-11-20 18:14:15	0.282004	1.77809e-05	-0.941737	-0.85664	9.08215	0.122783	0.016996	0.00947895	0.156296
GJ-1	2018-11-20 18:32:36	0.282029	1.56433e-05	-0.92129	-0.838041	7.81564	0.108676	0.0145792	0.00976905	1.01962
GJ-1	2018-11-21 09:14:20	0.281987	1.49071e-05	-0.990461	-0.88765	10.95	0.155065	0.0211547	0.00993391	-0.465064
GJ-1	2018-11-21 09:29:31	0.281955	1.88496e-05	-0.882963	-0.79131	7.67007	0.106922	0.0145554	0.00976925	-1.58376
GJ-1	2018-12-20 13:03:24	0.282036	2.35281e-05	-1.4752	-1.32522	6.39137	0.0904352	0.0112551	0.0101605	1.26956
GJ-1	2018-12-20 13:36:53	0.281948	2.41611e-05	-1.45183	-1.30422	6.46174	0.0890569	0.0113496	0.00988417	-1.8427
GJ-1	2018-12-20 14:17:56	0.282008	1.58909e-05	-1.45142	-1.34977	11.0518	0.154706	0.0194399	0.00998944	0.280812
GJ-1	2018-12-20 14:43:45	0.282001	1.49267e-05	-1.46292	-1.36046	10.7168	0.15288	0.0188389	0.0102422	0.0243293
GJ-1	2018-12-20 15:17:13	0.281988	1.45077e-05	-1.45085	-1.34924	11.0923	0.15383	0.0194893	0.00990085	-0.437061
GJ-1	2018-12-20 15:42:02	0.282001	1.48995e-05	-1.40865	-1.31	11.4352	0.155723	0.0200214	0.00969644	0.0522705
GJ-1	2018-12-20 17:57:46	0.282007	2.00024e-05	-1.4159	-1.26742	9.4682	0.135717	0.0165742	0.0101644	0.232247
GJ-1	2018-12-20 18:29:13	0.282012	1.84622e-05	-1.38788	-1.24234	9.88999	0.137891	0.0173453	0.00988102	0.412977
GJ-1	2018-12-20 18:42:05	0.281965	1.83111e-05	-1.37798	-1.23347	9.56797	0.131404	0.0167325	0.00972229	-1.22501
GJ-1	2018-12-20 19:17:13	0.281998	1.62964e-05	-1.38268	-1.26182	8.97522	0.12561	0.0156998	0.00992595	-0.0784992
GJ-1	2018-12-20 19:52:23	0.281981	2.03961e-05	-1.37798	-1.25752	8.65471	0.122754	0.0150459	0.010066	-0.683172
GJ-1	2018-12-20 20:26:04	0.282034	1.77131e-05	-1.35331	-1.23501	8.89501	0.12466	0.0154872	0.00993962	1.18945
GJ-1	2018-12-27 18:43:06	0.282033	2.44695e-05	-1.33311	-1.19815	6.26457	0.133192	0.0123782	0.0151285	1.15984
GJ-1	2018-12-27 19:05:11	0.28197	2.62062e-05	-1.30894	-1.17642	6.45308	0.1301	0.0126471	0.0142708	-1.04629
GJ-1	2018-12-27 19:26:19	0.28195	2.56093e-05	-1.28147	-1.15174	6.15733	0.122798	0.0120377	0.0141074	-1.768
GJ-1	2018-12-27 21:02:46	0.281984	2.93999e-05	-1.2108	-1.09296	4.4651	0.0879946	0.008571	0.0139357	-0.564199
GJ-1	2018-12-27 21:17:29	0.282015	3.26457e-05	-1.21027	-1.09249	4.31095	0.0835625	0.00826977	0.0136825	0.534977
GJ-1	2018-12-27 22:03:27	0.282041	3.72622e-05	-1.21024	-1.09246	4.06804	0.0829512	0.00777347	0.0144252	1.4434
PENGLAI	2018-10-16 11:13:32	0.282879	2.63973e-05	-1.5464	-1.43209	5.66502	0.176781	0.0146107	0.0223929	-0.946034
PENGLAI	2018-10-16 11:33:51	0.282949	2.41318e-05	-1.51257	-1.40076	6.35948	0.19128	0.0165492	0.0215971	1.52358
PENGLAI	2018-10-16 12:14:21	0.282924	1.69432e-05	-1.48674	-1.36541	9.1913	0.245297	0.0222172	0.0190992	0.651384
PENGLAI	2018-10-16 12:29:55	0.282912	1.77027e-05	-1.46691	-1.3472	9.3486	0.255574	0.023641	0.0194613	0.197459
PENGLAI	2018-10-16 13:01:29	0.282934	1.77399e-05	-1.46115	-1.33898	8.77552	0.244472	0.0221565	0.019937	0.988815
PENGLAI	2018-10-16 13:20:04	0.282898	1.69973e-05	-1.43186	-1.31214	9.37342	0.238608	0.0226765	0.0181013	-0.29203
PENGLAI	2018-10-16 14:06:55	0.282882	1.89394e-05	-1.406	-1.26876	8.59083	0.240903	0.0224195	0.0199667	-0.835241
PENGLAI	2018-10-16 14:22:22	0.282902	1.75466e-05	-1.38821	-1.25271	8.78082	0.224847	0.021744	0.018162	-0.131781
PENGLAI	2018-10-16 14:36:47	0.28289	1.79896e-05	-1.37416	-1.24003	7.97461	0.197874	0.0184315	0.0176998	-0.571867
PENGLAI	2018-10-16 14:50:00	0.282902	2.01793e-05	-1.36893	-1.2353	8.02558	0.148468	0.0141731	0.0131279	-0.130093
PENGLAI	2018-10-16 15:50:03	0.282895	1.97372e-05	-1.34139	-1.21289	7.38329	0.191246	0.0181919	0.0183676	-0.388001
PENGLAI	2018-10-16 16:07:15	0.282915	2.14491e-05	-1.34407	-1.21531	7.261	0.163575	0.0152827	0.01598	0.321021
PENGLAI	2018-10-16 16:14:18	0.282929	1.9008e-05	-1.34193	-1.21337	7.71528	0.110643	0.0108946	0.0102261	0.814004
PENGLAI	2018-10-16 16:18:19	0.282879	2.24342e-05	-1.33597	-1.20799	7.65457	0.112832	0.0111519	0.0104991	-0.962986
PENGLAI	2018-10-16 16:50:19	0.282916	1.87972e-05	-1.33507	-1.21473	8.06522	0.116949	0.0118463	0.0103124	0.355843
PENGLAI	2018-10-16 16:53:27	0.282903	1.96624e-05	-1.32029	-1.20128	7.44925	0.110522	0.0108506	0.0106043	-0.0958369
PENGLAI	2018-10-16 17:03:16	0.282914	1.92623e-05	-1.32994	-1.21006	7.50545	0.109832	0.0110427	0.0104091	0.283413
PENGLAI	2018-10-16 17:07:19	0.282929	1.8967e-05	-1.32419	-1.20482	7.50155	0.107816	0.0109022	0.0102182	0.804139
PENGLAI	2018-10-16 18:43:16	0.282881	2.28929e-05	-1.29849	-1.17002	6.03626	0.103661	0.0103719	0.0122965	-0.895985
PENGLAI	2018-10-16 18:46:04	0.282885	2.36894e-05	-1.29726	-1.16891	6.17959	0.104595	0.0105812	0.012095	-0.748159
PENGLAI	2018-10-16 18:48:52	0.282885	2.56489e-05	-1.29929	-1.17074	6.18888	0.106343	0.0106537	0.0122819	-0.735941
PENGLAI	2018-10-16 18:52:35	0.282902	2.2054e-05	-1.306	-1.17679	6.44115	0.124581	0.012501	0.0137628	-0.124488
PENGLAI	2018-10-16 19:58:20	0.282915	2.44951e-05	-1.30479	-1.15891	5.87748	0.122645	0.0117211	0.0148971	0.301856
PENGLAI	2018-10-16 20:05:44	0.282887	2.26393e-05	-1.29742	-1.15237	5.82025	0.138546	0.0129662	0.0169364	-0.654625
PENGLAI	2018-10-16 20:22:46	0.282853	2.7503e-05	-1.29522	-1.15041	5.65013	0.147956	0.0140853	0.0185727	-1.88499
PENGLAI	2018-10-16 20:36:49	0.282959	2.29674e-05	-1.29998	-1.15464	5.6416	0.133445	0.0128478	0.0167786	1.85724
PENGLAI	2018-10-17 11:11:36	0.282908	2.41215e-05	-1.50191	-1.39002	6.1144	0.180718	0.0149394	0.0211731	0.0677939
PENGLAI	2018-10-17 11:17:09	0.282926	2.56102e-05	-1.5173	-1.40426	6.28635	0.177368	0.0148911	0.0201618	0.69006
PENGLAI	2018-10-17 11:28:27	0.282913	2.17874e-05	-1.52603	-1.41234	6.2453	0.18366	0.0157186	0.0209788	0.257232
PENGLAI	2018-10-17 11:42:30	0.282902	2.45395e-05	-1.5286	-1.41472	6.11659	0.179499	0.0151282	0.0209848	-0.12801
PENGLAI	2018-10-17 12:03:16	0.282936	2.42708e-05	-1.56016	-1.44393	6.18962	0.168043	0.0148855	0.0193483	1.0513
PENGLAI	2018-10-17 12:09:20	0.282872	2.28891e-05	-1.55815	-1.44207	6.25758	0.175973	0.015752	0.0200379	-1.19384
PENGLAI	2018-10-17 12:24:37	0.282951	2.22202e-05	-1.57606	-1.45865	6.34985	0.166821	0.0152796	0.0186872	1.59065
PENGLAI	2018-10-17 12:27:41	0.282922	2.48039e-05	-1.58523	-1.46713	6.2798	0.168437	0.0153157	0.01909	0.566792
PENGLAI	2018-10-17 14:01:42	0.282938	2.52946e-05	-1.53899	-1.41901	5.6229	0.163659	0.0134336	0.0209214	1.1263
PENGLAI	2018-10-17 14:13:02	0.28292	2.38779e-05	-1.56351	-1.44162	5.50511	0.160648	0.0134361	0.0209773	0.493708
PENGLAI	2018-10-17 14:18:34	0.282902	2.36524e-05	-1.57376	-1.45107	5.56636	0.156279	0.0132948	0.0201659	-0.130501
PENGLAI	2018-10-17 14:30:09	0.282904	2.24907e-05	-1.59921	-1.47454	5.37211	0.153575	0.0131504	0.0205644	-0.0761755
PENGLAI	2018-10-17 14:35:57	0.282926	2.29945e-05	-1.60967	-1.48418	5.50808	0.156024	0.0135712	0.0203019	0.705358
PENGLAI	2018-10-17 15:02:27	0.282956	2.38928e-05	-1.64695	-1.51855	5.5353	0.150866	0.013518	0.0194923	1.78375
PENGLAI	2018-10-17 16:37:43	0.282949	2.89279e-05	-1.5879	-1.45329	5.25816	0.158597	0.0129175	0.0216543	1.50528
PENGLAI	2018-10-17 16:51:41	0.282925	2.54374e-05	-1.6323	-1.49394	5.31128	0.148897	0.0130099	0.020087	0.677156
PENGLAI	2018-10-17 17:04:25	0.282936	2.4226e-05	-1.6591	-1.51847	5.45939	0.146266	0.0130755	0.0191758	1.06166
PENGLAI	2018-10-17 17:31:08	0.282912	2.80173e-05	-1.67854	-1.53626	5.57158	0.142729	0.0128553	0.0183313	0.225022
PENGLAI	2018-10-17 17:45:15	0.282928	2.37351e-05	-1.67458	-1.53263	5.61389	0.141645	0.0128858	0.0180479	0.76783
PENGLAI	2018-10-17 17:58:00	0.282888	2.51829e-05	-1.68625	-1.54331	5.09704	0.138143	0.0121196	0.0194792	-0.649651
PENGLAI	2018-10-17 18:11:55	0.282866	2.36094e-05	-1.6742	-1.53228	5.59101	0.141603	0.0129273	0.018101	-1.42199
PENGLAI	2018-10-17 19:20:13	0.282937	2.7441e-05	-1.66984	-1.53463	5.27731	0.13771	0.0121647	0.0186694	1.10857
PENGLAI	2018-10-17 19:33:56	0.282939	2.56368e-05	-1.6783	-1.5424	5.33811	0.136721	0.012329	0.0182897	1.15254
PENGLAI	2018-10-17 19:46:27	0.282921	2.51676e-05	-1.69129	-1.55434	5.49907	0.137855	0.0126745	0.0178901	0.546491
PENGLAI	2018-10-17 20:00:12	0.282906	2.42906e-05	-1.68317	-1.54688	5.60064	0.1394	0.0128437	0.0177771	-0.0104408
PENGLAI	2018-10-17 20:12:42	0.282953	2.55191e-05	-1.68706	-1.55045	5.50912	0.137879	0.0127079	0.0178613	1.67642
PENGLAI	2018-10-17 20:26:27	0.282957	2.9269e-05	-1.6892	-1.55242	5.6434	0.140799	0.0129315	0.0178197	1.80522
PENGLAI	2018-10-18 12:30:53	0.282881	3.89665e-05	-1.36521	-1.25282	2.9498	0.0648263	0.00660762	0.0156989	-0.882432
PENGLAI	2018-10-18 13:23:31	0.282935	2.77425e-05	-1.51152	-1.39129	5.34756	0.170177	0.0135905	0.0227835	1.03402
PENGLAI	2018-10-18 13:40:22	0.282927	2.2749e-05	-1.49572	-1.37675	5.40121	0.167611	0.0136328	0.0221622	0.73595
PENGLAI	2018-10-18 13:53:31	0.282967	3.23e-05	-1.49564	-1.37667	5.30741	0.168486	0.0134887	0.0227405	2.15644
PENGLAI	2018-10-18 14:07:33	0.282909	2.73553e-05	-1.4989	-1.37967	5.35039	0.165246	0.0136182	0.0220522	0.107723
PENGLAI	2018-10-18 14:28:03	0.282922	2.11742e-05	-1.4881	-1.36973	5.38482	0.164418	0.0136095	0.0217715	0.571402
PENGLAI	2018-10-18 16:10:40	0.282897	2.32084e-05	-1.48812	-1.36785	5.1279	0.16024	0.0131938	0.0223189	-0.322873
PENGLAI	2018-10-18 16:27:48	0.282915	2.60635e-05	-1.47941	-1.35984	4.99183	0.152032	0.0126752	0.0217065	0.310016
PENGLAI	2018-10-18 16:46:07	0.282853	3.03939e-05	-1.47522	-1.35599	5.03621	0.150637	0.0126659	0.0213413	-1.86013
PENGLAI	2018-10-18 17:03:14	0.282927	2.47454e-05	-1.47256	-1.35355	5.14969	0.1472	0.0125882	0.0203881	0.755722
PENGLAI	2018-10-18 17:21:27	0.282884	2.68968e-05	-1.47063	-1.35177	5.02833	0.143039	0.0120068	0.0203718	-0.779423
PENGLAI	2018-10-18 17:39:27	0.282913	2.62656e-05	-1.46881	-1.3501	4.88345	0.140847	0.0118903	0.0206668	0.251491
PENGLAI	2018-10-18 17:51:21	0.282951	2.84302e-05	-1.47186	-1.3529	4.75713	0.13792	0.0112657	0.0207772	1.59038
PENGLAI	2018-10-18 18:34:39	0.282888	2.18723e-05	-1.51541	-1.4027	5.65406	0.157024	0.0127329	0.0198974	-0.625596
PENGLAI	2018-10-18 18:52:42	0.282941	2.76381e-05	-1.50317	-1.39137	5.47267	0.150921	0.0130069	0.0196093	1.24268
PENGLAI	2018-11-06 18:08:20	0.282936	2.51929e-05	-1.33277	-1.22322	5.41884	0.188126	0.0143156	0.0246592	1.04878
PENGLAI	2018-11-06 18:17:40	0.282899	2.53184e-05	-1.34162	-1.23134	5.17037	0.1781	0.0139104	0.024467	-0.232727
PENGLAI	2018-11-06 18:32:42	0.282934	2.74796e-05	-1.3982	-1.28326	4.8545	0.156662	0.0127401	0.022958	0.97308
PENGLAI	2018-11-07 09:26:08	0.282906	1.87774e-05	-1.4345	-1.29584	7.49158	0.153731	0.017371	0.0145685	-0.0130829
PENGLAI	2018-11-07 09:49:55	0.282937	2.28247e-05	-1.46626	-1.32452	6.44958	0.123749	0.0142899	0.0135801	1.10121
PENGLAI	2018-11-07 10:13:43	0.282933	2.0387e-05	-1.47968	-1.33665	5.78708	0.109029	0.0128464	0.0133102	0.9665
PENGLAI	2018-11-07 10:38:16	0.282961	2.89318e-05	-1.49804	-1.35323	5.51657	0.11103	0.0125709	0.0143138	1.9502
PENGLAI	2018-11-07 12:25:04	0.28294	2.30667e-05	-1.51035	-1.36882	5.10593	0.0925566	0.0109954	0.0128722	1.20857
PENGLAI	2018-11-07 12:47:34	0.282925	2.84013e-05	-1.52698	-1.38389	4.55298	0.0805959	0.00983143	0.0125358	0.662912
PENGLAI	2018-11-07 13:10:23	0.282902	2.68365e-05	-1.52749	-1.38435	4.40808	0.077928	0.00944372	0.012518	-0.134864
PENGLAI	2018-11-07 13:33:20	0.282926	2.89165e-05	-1.53945	-1.39519	4.40029	0.0785747	0.00932827	0.0126455	0.722335
PENGLAI	2018-11-07 13:56:24	0.282898	2.7469e-05	-1.53735	-1.39329	4.41932	0.0821525	0.00961064	0.0131349	-0.27245
PENGLAI	2018-11-07 15:16:27	0.282961	2.91237e-05	-1.52874	-1.41915	4.68381	0.0802826	0.0100235	0.0121474	1.94023
PENGLAI	2018-11-07 15:36:10	0.282881	3.35668e-05	-1.54995	-1.43884	4.37325	0.0742061	0.00931412	0.0120379	-0.87229
PENGLAI	2018-11-07 19:00:30	0.28293	2.17243e-05	-1.4493	-1.33709	5.9564	0.134149	0.0125975	0.0159768	0.84648
PENGLAI	2018-11-07 19:22:59	0.282906	2.31919e-05	-1.44837	-1.33624	6.06567	0.131406	0.0127329	0.0153519	-0.00374013
PENGLAI	2018-11-07 20:14:02	0.282927	2.5465e-05	-1.45754	-1.34469	5.8274	0.133294	0.0127252	0.0162718	0.741459
PENGLAI	2018-11-07 20:37:12	0.282885	2.39139e-05	-1.474	-1.35988	5.68218	0.12681	0.012172	0.0158398	-0.738509
PENGLAI	2018-11-07 20:43:01	0.282915	2.65453e-05	-1.45391	-1.34134	5.81263	0.119306	0.0114062	0.0145248	0.329708
PENGLAI	2018-11-20 15:48:31	0.282911	1.72715e-05	-1.11237	-1.03728	10.303	0.224023	0.0235284	0.0153559	0.19114
PENGLAI	2018-11-20 16:16:04	0.282893	1.57335e-05	-1.05167	-0.980681	9.25635	0.195159	0.0207427	0.0148653	-0.447566
PENGLAI	2018-11-20 18:09:41	0.282895	2.13036e-05	-0.931814	-0.847614	6.41943	0.125072	0.0139741	0.0136637	-0.372837
PENGLAI	2018-11-20 18:28:00	0.282939	2.47332e-05	-0.915226	-0.832525	5.78067	0.121588	0.0134778	0.0147312	1.17529
PENGLAI	2018-11-20 18:55:59	0.282936	2.40756e-05	-0.913336	-0.830805	5.37924	0.10845	0.0125219	0.0141196	1.06876
PENGLAI	2018-11-21 09:19:08	0.282882	2.12455e-05	-0.936022	-0.838862	7.13741	0.152625	0.0171429	0.0149675	-0.849566
PENGLAI	2018-11-21 09:35:12	0.282882	2.61721e-05	-0.868742	-0.778566	5.53035	0.103887	0.0116736	0.0131364	-0.831418
PENGLAI	2018-11-22 10:12:28	0.282895	2.12919e-05	-0.995941	-0.910951	8.21858	0.200955	0.0202177	0.0171873	-0.379234
PENGLAI	2018-11-22 10:26:02	0.28291	1.93673e-05	-0.96812	-0.885504	7.4175	0.17478	0.0177631	0.0165346	0.144933
PENGLAI	2018-11-22 12:47:49	0.282919	2.42876e-05	-0.931144	-0.835603	5.57358	0.124339	0.0123388	0.0157032	0.475798
PENGLAI	2018-11-22 13:05:35	0.282899	2.48119e-05	-0.925222	-0.83029	5.66196	0.120794	0.0120541	0.0149848	-0.256952
PENGLAI	2018-11-22 13:17:00	0.282941	2.44672e-05	-0.92693	-0.831822	5.92527	0.122433	0.0123104	0.0145023	1.25107
PENGLAI	2018-11-22 13:37:36	0.282931	2.18863e-05	-0.938087	-0.841834	6.0435	0.123123	0.012632	0.0142803	0.900594
PENGLAI	2018-11-22 13:59:07	0.282954	2.33181e-05	-0.937179	-0.841019	6.11017	0.124258	0.0127225	0.0142492	1.6973
PENGLAI	2018-11-22 14:27:03	0.282902	2.14666e-05	-0.935363	-0.839389	6.36495	0.131486	0.013511	0.0144724	-0.130553
PENGLAI	2018-11-22 16:00:05	0.282943	1.92436e-05	-0.942693	-0.845967	6.09943	0.132933	0.0137429	0.0152805	1.3155
PENGLAI	2018-11-25 12:48:29	0.282929	2.08995e-05	-1.28726	-1.16494	8.27513	0.171929	0.0191178	0.0147378	0.828234
PENGLAI	2018-11-25 13:05:35	0.282876	1.87599e-05	-1.29	-1.16742	8.21159	0.166936	0.0187358	0.01442	-1.04933
PENGLAI	2018-11-25 13:23:53	0.282935	2.01107e-05	-1.3072	-1.18299	7.8999	0.1582	0.017695	0.0142097	1.03099
PENGLAI	2018-11-25 13:35:25	0.282915	2.04221e-05	-1.30551	-1.18145	7.96421	0.161891	0.0182356	0.0143536	0.307932
PENGLAI	2018-11-25 13:52:28	0.282891	1.92637e-05	-1.30278	-1.17898	8.13377	0.160239	0.0182728	0.0139289	-0.541194
PENGLAI	2018-11-25 14:16:15	0.28295	1.95181e-05	-1.30728	-1.18305	7.83125	0.154677	0.0174928	0.0139636	1.54175
PENGLAI	2018-11-25 14:39:03	0.282942	2.08332e-05	-1.31173	-1.18708	7.92342	0.158187	0.0179852	0.0141243	1.27004
PENGLAI	2018-12-05 11:30:53	0.2829	1.81168e-05	-1.2661	-1.10899	8.51544	0.156976	0.0189564	0.0132087	-0.224662
PENGLAI	2018-12-05 11:47:26	0.282916	1.79973e-05	-1.24499	-1.0905	8.74827	0.150348	0.0189031	0.0122258	0.348826
PENGLAI	2018-12-05 12:04:53	0.28292	1.77293e-05	-1.23249	-1.07955	8.3202	0.132114	0.0167664	0.0112324	0.506075
PENGLAI	2018-12-05 12:21:29	0.28288	1.9067e-05	-1.22113	-1.0696	8.38177	0.0983716	0.0124747	0.00830952	-0.902249
PENGLAI	2018-12-05 12:38:22	0.282894	1.91711e-05	-1.22732	-1.07502	8.51655	0.0948401	0.0121009	0.00787985	-0.41414
PENGLAI	2018-12-05 14:46:19	0.282904	2.01514e-05	-1.25397	-1.12081	7.61805	0.128132	0.0153245	0.0120664	-0.0564
PENGLAI	2018-12-05 15:03:09	0.282905	1.71194e-05	-1.24397	-1.11187	8.02417	0.123518	0.0156948	0.0109153	-0.0384805
PENGLAI	2018-12-05 15:21:03	0.282898	2.07569e-05	-1.23155	-1.10076	8.24584	0.109371	0.013974	0.00940743	-0.274621
PENGLAI	2018-12-05 15:38:09	0.282888	1.96819e-05	-1.23615	-1.10488	7.81342	0.146641	0.0187655	0.0132747	-0.640316
PENGLAI	2018-12-05 15:55:18	0.282879	2.22543e-05	-1.228	-1.0976	7.76763	0.0870408	0.0111824	0.00794174	-0.962792
PENGLAI	2018-12-05 16:13:13	0.282891	2.05974e-05	-1.2253	-1.09518	7.84204	0.0858668	0.0110061	0.00774663	-0.542844
PENGLAI	2018-12-05 18:15:10	0.282873	2.14103e-05	-1.20947	-1.03629	6.68082	0.0654546	0.00799976	0.00709845	-1.17863
PENGLAI	2018-12-05 18:33:11	0.282866	2.11377e-05	-1.17863	-1.00987	6.75033	0.0890949	0.0112936	0.00952659	-1.42211
PENGLAI	2018-12-05 18:51:14	0.282905	2.29016e-05	-1.1708	-1.00316	6.24779	0.092583	0.0114673	0.0106049	-0.0392245
PENGLAI	2018-12-05 19:08:25	0.282898	2.21207e-05	-1.17816	-1.00947	6.79926	0.0862616	0.0108849	0.00909322	-0.295469
PENGLAI	2018-12-05 19:25:21	0.282905	1.87056e-05	-1.17325	-1.00526	6.87086	0.117319	0.0147317	0.0123724	-0.0219846
PENGLAI	2018-12-05 19:43:10	0.282941	2.0424e-05	-1.183	-1.01361	6.95833	0.103649	0.0133022	0.0105914	1.24372
PENGLAI	2018-12-05 21:07:36	0.282923	1.88888e-05	-1.223	-1.059	6.55345	0.0698854	0.00851925	0.00766144	0.588142
PENGLAI	2018-12-05 21:24:16	0.282915	2.15811e-05	-1.21035	-1.04804	6.82816	0.0677693	0.00853596	0.00710715	0.328482
PENGLAI	2018-12-05 21:42:02	0.282883	1.95766e-05	-1.20628	-1.04452	6.8448	0.062984	0.00778027	0.00657577	-0.814724
PENGLAI	2018-12-05 21:58:49	0.282936	2.26996e-05	-1.20876	-1.04667	6.74781	0.0684669	0.00859167	0.00726823	1.04608
PENGLAI	2018-12-05 22:15:36	0.282891	2.18823e-05	-1.20542	-1.04377	6.751	0.0708543	0.00890086	0.00752291	-0.543051
PENGLAI	2018-12-05 22:33:21	0.282903	2.13791e-05	-1.20857	-1.0465	6.68948	0.0737083	0.00933893	0.00784278	-0.0988271
PENGLAI	2018-12-05 22:50:12	0.28287	2.18932e-05	-1.20658	-1.04477	6.68142	0.0813034	0.00996543	0.00869248	-1.2581
PENGLAI	2018-12-07 11:57:07	0.282894	1.80159e-05	-1.18615	-1.05002	7.83809	0.106063	0.0120193	0.00956382	-0.440241
PENGLAI	2018-12-07 12:14:03	0.282915	1.56759e-05	-1.16099	-1.02775	7.76425	0.101867	0.0116839	0.00925562	0.318883
PENGLAI	2018-12-07 12:32:02	0.282922	1.75818e-05	-1.13521	-1.00493	7.87992	0.106197	0.012571	0.0094908	0.561973
PENGLAI	2018-12-07 12:49:05	0.282886	1.95515e-05	-1.12451	-0.995457	7.75782	0.118109	0.0140909	0.0107128	-0.705
PENGLAI	2018-12-07 13:06:06	0.282926	2.01616e-05	-1.11012	-0.982714	7.62525	0.108021	0.0129488	0.00994881	0.689651
PENGLAI	2018-12-07 13:24:06	0.282898	1.91814e-05	-1.09279	-0.967381	7.26674	0.0868717	0.0102722	0.00841459	-0.272776
PENGLAI	2018-12-07 13:41:03	0.282893	2.17646e-05	-1.0925	-0.96712	7.11242	0.118215	0.0144085	0.0116687	-0.452884
PENGLAI	2018-12-07 13:57:02	0.282911	1.97805e-05	-1.06505	-0.942822	7.03138	0.0954648	0.0115433	0.00954393	0.178094
PENGLAI	2018-12-20 12:52:10	0.2829	2.7745e-05	-1.47128	-1.32169	5.01155	0.0998959	0.0105407	0.0142897	-0.224579
PENGLAI	2018-12-20 13:09:13	0.282876	2.52452e-05	-1.45587	-1.30785	5.16692	0.100995	0.0109448	0.0139454	-1.07769
PENGLAI	2018-12-20 13:25:28	0.282898	2.64364e-05	-1.45044	-1.30297	5.33749	0.101723	0.0112525	0.0135636	-0.269167
PENGLAI	2018-12-20 13:42:41	0.282954	2.70159e-05	-1.44337	-1.29663	5.12464	0.0995159	0.0107504	0.013877	1.70084
PENGLAI	2018-12-20 13:58:56	0.282866	2.72306e-05	-1.42549	-1.28056	5.03835	0.0986938	0.010482	0.0140355	-1.41726
PENGLAI	2018-12-20 14:06:31	0.282925	1.74395e-05	-1.42407	-1.32434	9.1126	0.180116	0.0189947	0.0141498	0.655247
PENGLAI	2018-12-20 14:33:14	0.282914	1.99606e-05	-1.48934	-1.38503	8.74893	0.176696	0.0184756	0.0144667	0.279019
PENGLAI	2018-12-20 14:49:33	0.282917	1.78955e-05	-1.4495	-1.34798	8.52278	0.170537	0.0176751	0.0143167	0.392757
PENGLAI	2018-12-20 15:05:49	0.282902	1.88954e-05	-1.42923	-1.32914	9.50233	0.179343	0.019942	0.0133995	-0.128798
PENGLAI	2018-12-20 15:23:58	0.282903	1.87387e-05	-1.40254	-1.30431	9.8253	0.184233	0.0205404	0.013305	-0.106486
PENGLAI	2018-12-20 17:45:44	0.282903	2.2625e-05	-1.42084	-1.27184	7.3074	0.141498	0.0145981	0.0137657	-0.107468
PENGLAI	2018-12-20 18:02:26	0.282935	2.49055e-05	-1.41722	-1.2686	7.14295	0.141307	0.0148167	0.0140448	1.02403
PENGLAI	2018-12-20 18:19:06	0.282894	2.31142e-05	-1.39303	-1.24695	6.90657	0.139026	0.0144203	0.0143261	-0.414151
PENGLAI	2018-12-20 18:34:44	0.282894	2.31418e-05	-1.38142	-1.23655	6.94249	0.138592	0.0144352	0.014205	-0.418943
PENGLAI	2018-12-20 18:47:36	0.282942	2.46563e-05	-1.37877	-1.23419	7.00904	0.130349	0.0134415	0.0132673	1.26189
PENGLAI	2018-12-20 18:54:02	0.282909	2.12952e-05	-1.37887	-1.23427	6.95603	0.139182	0.0143736	0.0142636	0.0952505
PENGLAI	2018-12-20 19:08:02	0.282897	2.03686e-05	-1.37673	-1.25639	7.00438	0.133127	0.0139771	0.0135081	-0.324664
PENGLAI	2018-12-20 19:22:44	0.282942	2.29403e-05	-1.37982	-1.25921	6.21912	0.121518	0.0127617	0.0138864	1.27819
PENGLAI	2018-12-20 19:41:10	0.282934	2.26476e-05	-1.38024	-1.25959	6.44204	0.125965	0.0134158	0.0139108	0.998566
PENGLAI	2018-12-20 19:58:02	0.282903	2.15372e-05	-1.38073	-1.26003	6.27337	0.122626	0.0130421	0.0139321	-0.0968995
PENGLAI	2018-12-20 20:10:09	0.282943	2.20242e-05	-1.36622	-1.24679	6.70577	0.118726	0.0127746	0.0126095	1.31733
PENGLAI	2018-12-25 09:48:23	0.28289	2.08976e-05	-1.32525	-1.20086	7.62504	0.132086	0.014689	0.0123221	-0.58166
PENGLAI	2018-12-25 09:53:54	0.282899	1.91694e-05	-1.3132	-1.18994	7.81719	0.131319	0.0151436	0.0119185	-0.237358
PENGLAI	2018-12-25 09:59:26	0.282894	2.11227e-05	-1.30802	-1.18525	7.67782	0.130356	0.0151141	0.0120386	-0.427767
PENGLAI	2018-12-25 10:04:57	0.282895	1.83826e-05	-1.30168	-1.17951	8.30319	0.135312	0.0160921	0.0115378	-0.386061
PENGLAI	2018-12-25 10:10:28	0.282892	1.97543e-05	-1.28914	-1.16814	7.29997	0.125308	0.0141434	0.0121874	-0.497352
PENGLAI	2018-12-27 18:58:44	0.282922	2.58393e-05	-1.30922	-1.17668	5.04498	0.136185	0.0108935	0.0191979	0.581039
PENGLAI	2018-12-27 19:16:13	0.282851	2.45802e-05	-1.29687	-1.16558	4.79722	0.137037	0.0109806	0.0203214	-1.94299
PENGLAI	2018-12-27 20:51:44	0.282937	3.79229e-05	-1.25619	-1.13394	3.19505	0.071372	0.00687089	0.0157509	1.09798
PENGLAI	2018-12-27 21:07:22	0.282944	3.40256e-05	-1.21121	-1.09334	3.96081	0.0988855	0.00843259	0.0176198	1.35722
PENGLAI	2018-12-27 21:22:59	0.282954	3.44611e-05	-1.20781	-1.09026	3.88953	0.0962046	0.00829146	0.0174562	1.71388
PENGLAI	2018-12-27 21:34:15	0.282956	2.9616e-05	-1.21568	-1.09737	3.50607	0.0923976	0.00764657	0.018662	1.77815
PENGLAI	2018-12-27 21:41:45	0.282884	3.38853e-05	-1.20434	-1.08713	3.71502	0.0936985	0.00792875	0.0178387	-0.764157
PLE	2018-10-16 11:19:10	0.282471	1.43817e-05	-1.53607	-1.42252	13.3683	0.313991	0.0226293	0.0167521	-0.398201
PLE	2018-10-16 11:28:13	0.282483	1.42097e-05	-1.53487	-1.42141	14.0507	0.324263	0.0237487	0.0164477	0.0288608
PLE	2018-10-16 12:21:12	0.282471	1.11457e-05	-1.47147	-1.35139	20.7235	0.45573	0.0354971	0.0155872	-0.377885
PLE	2018-10-16 12:32:55	0.282457	1.15739e-05	-1.46331	-1.34389	20.7808	0.450861	0.035233	0.0153618	-0.892489
PLE	2018-10-16 13:04:32	0.282486	1.12206e-05	-1.45522	-1.33355	20.2692	0.42787	0.0329916	0.0149408	0.142207
PLE	2018-10-16 13:16:07	0.282465	1.12181e-05	-1.43371	-1.31384	20.7718	0.425061	0.0336396	0.014469	-0.606506
PLE	2018-10-16 14:03:52	0.282491	1.10076e-05	-1.4205	-1.28184	20.2717	0.430832	0.0345526	0.015055	0.323559
PLE	2018-10-16 14:13:50	0.282494	1.2477e-05	-1.39428	-1.25818	20.3253	0.392014	0.0319307	0.0136551	0.427782
PLE	2018-10-16 14:40:12	0.28248	1.00102e-05	-1.37332	-1.23927	19.3782	0.413169	0.0338119	0.0150973	-0.0784234
PLE	2018-10-16 14:53:58	0.282466	1.09283e-05	-1.364	-1.23086	19.464	0.389275	0.0324559	0.014152	-0.576125
PLE	2018-10-16 15:28:53	0.28247	1.12747e-05	-1.3725	-1.24101	18.5665	0.414469	0.0334462	0.0157931	-0.438241
PLE	2018-10-16 15:43:11	0.282471	1.16183e-05	-1.35337	-1.22372	17.6731	0.363121	0.029472	0.0145244	-0.406356
PLE	2018-10-16 15:47:03	0.282471	1.2457e-05	-1.34747	-1.21839	18.0669	0.339163	0.0276898	0.0132633	-0.40226
PLE	2018-10-16 15:57:43	0.282473	1.16314e-05	-1.3511	-1.22167	16.4586	0.339895	0.0274128	0.0145805	-0.315692
PLE	2018-10-16 16:56:31	0.282465	1.31275e-05	-1.33827	-1.21763	15.9509	0.33453	0.026766	0.0148186	-0.58719
PLE	2018-10-16 17:10:21	0.282476	1.20039e-05	-1.33347	-1.21327	15.5829	0.306807	0.0246057	0.0139073	-0.215557
PLE	2018-10-16 17:17:04	0.282476	1.17095e-05	-1.33125	-1.21125	15.6661	0.34834	0.0283449	0.0157004	-0.2169
PLE	2018-10-16 17:21:54	0.282478	1.21735e-05	-1.33224	-1.21215	15.9804	0.310959	0.02531	0.0137395	-0.149682
PLE	2018-10-16 18:23:19	0.282485	1.35121e-05	-1.31463	-1.18456	15.5793	0.312824	0.0259166	0.0141383	0.0963433
PLE	2018-10-16 18:29:56	0.28249	1.40051e-05	-1.31917	-1.18865	14.8676	0.336387	0.0268601	0.01597	0.288598
PLE	2018-10-16 18:32:52	0.282468	1.20883e-05	-1.30958	-1.18001	15.4746	0.249764	0.0203429	0.011389	-0.481283
PLE	2018-10-16 18:35:37	0.282488	1.36322e-05	-1.32228	-1.19146	16.1072	0.140546	0.0116501	0.00615339	0.221191
PLE	2018-10-16 20:02:57	0.282516	1.36089e-05	-1.3079	-1.16168	13.9065	0.327494	0.0266034	0.0165969	1.18763
PLE	2018-10-16 20:16:06	0.282486	1.28452e-05	-1.30701	-1.16088	13.9306	0.281867	0.0233074	0.0142693	0.150957
PLE	2018-10-16 20:17:56	0.282503	1.23779e-05	-1.31213	-1.16543	14.7169	0.182731	0.0150941	0.00875651	0.738165
PLE	2018-10-16 20:27:23	0.282495	1.38122e-05	-1.30973	-1.1633	14.1295	0.263429	0.0219499	0.0131649	0.452691
PLE	2018-10-17 11:14:22	0.28249	1.33658e-05	-1.52383	-1.4103	14.9671	0.295501	0.0214261	0.0140247	0.286429
PLE	2018-10-17 11:19:56	0.282473	1.2563e-05	-1.52456	-1.41098	14.6058	0.2859	0.0205471	0.013908	-0.307102
PLE	2018-10-17 11:31:13	0.282479	1.4767e-05	-1.53746	-1.42291	14.0755	0.255673	0.0181077	0.0129018	-0.115488
PLE	2018-10-17 11:33:59	0.282476	1.22054e-05	-1.53808	-1.42349	14.7897	0.266762	0.0191069	0.0128172	-0.20457
PLE	2018-10-17 11:39:36	0.282489	1.2305e-05	-1.54348	-1.42849	14.6945	0.290585	0.0216596	0.0140397	0.264082
PLE	2018-10-17 11:51:10	0.282479	1.48355e-05	-1.55224	-1.4366	14.1496	0.266462	0.0197366	0.0133727	-0.11598
PLE	2018-10-17 11:53:56	0.282481	1.38206e-05	-1.55458	-1.43876	14.3191	0.249972	0.0179744	0.0124123	-0.0328414
PLE	2018-10-17 12:00:22	0.282479	1.40389e-05	-1.56734	-1.45057	15.026	0.220134	0.0161621	0.0104015	-0.110765
PLE	2018-10-17 14:07:14	0.282479	1.47032e-05	-1.5601	-1.43847	13.5773	0.35742	0.0257581	0.0187029	-0.104118
PLE	2018-10-17 14:15:48	0.282455	1.39329e-05	-1.57095	-1.44848	14.1498	0.299212	0.0224127	0.0150219	-0.965842
PLE	2018-10-17 14:41:44	0.282463	1.28374e-05	-1.61848	-1.49231	13.972	0.283777	0.0217066	0.0144486	-0.669653
PLE	2018-10-17 14:44:30	0.282471	1.26497e-05	-1.62778	-1.50087	14.6787	0.0829414	0.00619909	0.00401725	-0.382721
PLE	2018-10-17 14:53:00	0.282477	1.46704e-05	-1.63021	-1.50312	12.8055	0.295101	0.0219287	0.016407	-0.169929
PLE	2018-10-17 14:58:46	0.282476	1.25343e-05	-1.64033	-1.51245	13.3993	0.265209	0.0201539	0.0141099	-0.226343
PLE	2018-10-17 16:41:40	0.282484	1.48019e-05	-1.61414	-1.47732	12.5862	0.235642	0.0172626	0.0133062	0.053602
PLE	2018-10-17 16:55:36	0.282493	1.32575e-05	-1.65082	-1.51089	12.8802	0.23816	0.0182564	0.0131346	0.37413
PLE	2018-10-17 17:08:23	0.282494	1.43558e-05	-1.66236	-1.52145	13.2957	0.246585	0.0192516	0.0131919	0.433388
PLE	2018-10-17 17:22:19	0.282493	1.49208e-05	-1.6672	-1.52588	12.8686	0.276336	0.0215193	0.0152754	0.397815
PLE	2018-10-17 17:35:08	0.282479	1.35738e-05	-1.67038	-1.52879	12.8281	0.273588	0.0211436	0.0151864	-0.0977399
PLE	2018-10-17 17:49:12	0.282475	1.22995e-05	-1.67576	-1.53371	12.6907	0.276135	0.0209797	0.0154961	-0.254856
PLE	2018-10-17 18:01:58	0.282493	1.47516e-05	-1.67605	-1.53397	12.4676	0.282634	0.0216966	0.0161132	0.393491
PLE	2018-10-17 18:15:50	0.282504	1.3102e-05	-1.68577	-1.54287	12.8642	0.280892	0.0217186	0.0155434	0.771621
PLE	2018-10-17 19:24:11	0.282473	1.34077e-05	-1.67185	-1.53647	12.2651	0.292184	0.0220543	0.0169458	-0.317848
PLE	2018-10-17 19:37:52	0.282452	1.49617e-05	-1.6811	-1.54497	12.2331	0.28166	0.021718	0.0163745	-1.07351
PLE	2018-10-17 19:50:26	0.28248	1.8507e-05	-1.69646	-1.55909	12.0664	0.0762022	0.00554739	0.00450472	-0.075545
PLE	2018-10-17 20:04:08	0.282479	1.41248e-05	-1.69266	-1.5556	12.6858	0.246912	0.0191855	0.013877	-0.10188
PLE	2018-10-17 20:16:40	0.282475	1.38312e-05	-1.70022	-1.56254	12.7015	0.0659118	0.00490108	0.00369893	-0.262358
PLE	2018-10-17 20:30:24	0.282472	1.25379e-05	-1.69593	-1.5586	13.1436	0.0756114	0.00566227	0.00410208	-0.365754
PLE	2018-10-18 12:26:17	0.282457	1.92246e-05	-1.34761	-1.23667	8.05789	0.0824711	0.00697752	0.00727039	-0.886363
PLE	2018-10-18 12:45:54	0.282485	2.27951e-05	-1.39254	-1.2779	6.66229	0.0659961	0.00569886	0.00705062	0.105895
PLE	2018-10-18 13:35:45	0.282492	1.31802e-05	-1.50609	-1.38629	13.2525	0.201486	0.0134198	0.0108526	0.365724
PLE	2018-10-18 13:58:07	0.28249	1.50445e-05	-1.5004	-1.38105	13.5563	0.201146	0.0134799	0.0105722	0.280884
PLE	2018-10-18 14:13:59	0.282452	1.58445e-05	-1.50193	-1.38246	13.2172	0.193593	0.013161	0.0104307	-1.05882
PLE	2018-10-18 14:33:35	0.282448	1.41199e-05	-1.4959	-1.37691	12.845	0.187434	0.0126495	0.01043	-1.18956
PLE	2018-10-18 16:04:52	0.282483	1.57503e-05	-1.49774	-1.37669	12.8872	0.196836	0.013164	0.0108651	0.0521614
PLE	2018-10-18 16:22:01	0.282463	1.53607e-05	-1.48376	-1.36384	12.3649	0.182514	0.0124302	0.0105146	-0.68676
PLE	2018-10-18 16:40:20	0.282472	1.37791e-05	-1.47876	-1.35925	12.2036	0.179633	0.0122511	0.0104805	-0.351464
PLE	2018-10-18 16:57:26	0.282491	1.54405e-05	-1.48471	-1.36471	12.1511	0.173002	0.0120402	0.0101356	0.314922
PLE	2018-10-18 17:15:43	0.282459	1.64089e-05	-1.47595	-1.35666	11.487	0.167868	0.0115082	0.0104254	-0.824898
PLE	2018-10-18 17:32:45	0.282487	1.42372e-05	-1.47452	-1.35535	11.9767	0.177618	0.0122275	0.0105437	0.175726
PLE	2018-10-18 17:44:19	0.282477	1.47635e-05	-1.47616	-1.35686	12.5075	0.175336	0.0124517	0.00994241	-0.192576
PLE	2018-10-18 18:28:59	0.282466	1.2898e-05	-1.52405	-1.41069	13.8661	0.21996	0.0146101	0.0112911	-0.576402
PLE	2018-10-18 18:47:02	0.282472	1.3569e-05	-1.49349	-1.38241	13.3149	0.200606	0.0137311	0.0107052	-0.343321
PLE	2018-11-02 08:57:59	0.282493	9.49979e-06	-1.4381	-1.28828	18.814	0.0990808	0.0098334	0.00374101	0.400405
PLE	2018-11-02 09:08:19	0.282461	1.23795e-05	-1.48057	-1.32632	14.3404	0.0835611	0.00858415	0.00413477	-0.734561
PLE	2018-11-02 09:15:48	0.282459	1.58103e-05	-1.50255	-1.34602	11.9201	0.0738861	0.00753521	0.00439237	-0.810251
PLE	2018-11-02 09:27:01	0.282451	1.5152e-05	-1.5125	-1.35493	11.4508	0.083783	0.00872639	0.00519712	-1.08207
PLE	2018-11-02 09:40:08	0.282487	1.74984e-05	-1.54702	-1.38585	9.66377	0.0601003	0.00633297	0.00441655	0.180192
PLE	2018-11-02 09:45:51	0.282469	1.5687e-05	-1.54561	-1.38459	9.5497	0.0614543	0.00634875	0.00456815	-0.471301
PLE	2018-11-02 09:57:11	0.282501	1.73927e-05	-1.55542	-1.39337	9.85355	0.0561935	0.0062486	0.00405026	0.674754
PLE	2018-11-02 14:34:51	0.282487	1.32912e-05	-1.47664	-1.36486	13.2678	0.193864	0.0145037	0.0103674	0.188449
PLE	2018-11-02 14:46:52	0.282489	1.40374e-05	-1.48528	-1.37285	12.6774	0.184615	0.0138078	0.0103454	0.23609
PLE	2018-11-02 14:58:52	0.282483	1.27286e-05	-1.48949	-1.37674	12.4296	0.157819	0.0115251	0.00901351	0.0268256
PLE	2018-11-02 15:10:54	0.282454	1.41657e-05	-1.48754	-1.37494	12.1259	0.165086	0.0123852	0.00967107	-0.988363
PLE	2018-11-02 15:22:55	0.282486	1.60327e-05	-1.49486	-1.3817	11.7516	0.158506	0.0120165	0.00958349	0.131454
PLE	2018-11-02 15:34:56	0.282469	1.53571e-05	-1.49589	-1.38265	12.0263	0.153523	0.0117214	0.00906609	-0.450319
PLE	2018-11-02 17:03:39	0.282472	1.38264e-05	-1.46949	-1.34951	12.3204	0.371323	0.0283034	0.0213278	-0.368699
PLE	2018-11-02 17:15:40	0.282449	1.45517e-05	-1.46676	-1.347	12.8323	0.327671	0.0236211	0.0179972	-1.16684
PLE	2018-11-02 17:24:56	0.282461	1.43807e-05	-1.47147	-1.35132	13.0198	0.329088	0.023504	0.0178802	-0.755887
PLE	2018-11-02 17:34:11	0.282538	1.42386e-05	-1.48141	-1.36045	12.6801	0.604458	0.0444164	0.0338671	1.99126
PLE	2018-11-02 18:50:13	0.282454	1.46519e-05	-1.44495	-1.33249	12.9269	0.184541	0.0122368	0.0101255	-1.00445
PLE	2018-11-02 18:56:47	0.282465	1.48633e-05	-1.4619	-1.34812	13.3103	0.169557	0.011697	0.00903454	-0.597081
PLE	2018-11-02 19:13:43	0.282485	1.45368e-05	-1.47263	-1.35801	13.2485	0.155154	0.0112519	0.00832994	0.12315
PLE	2018-11-02 19:30:38	0.282456	1.41701e-05	-1.47435	-1.3596	12.864	0.155093	0.0110652	0.00855698	-0.920858
PLE	2018-11-02 19:56:47	0.282514	1.30558e-05	-1.48443	-1.3689	14.1559	0.152078	0.0111561	0.00764373	1.12492
PLE	2018-11-02 20:13:41	0.28249	1.39022e-05	-1.48809	-1.37228	12.19	0.182519	0.0124431	0.0106281	0.267126
PLE	2018-11-06 18:07:25	0.282502	1.76133e-05	-1.35406	-1.24275	10.9715	0.278636	0.0164001	0.0180923	0.714957
PLE	2018-11-06 18:16:45	0.282466	1.62071e-05	-1.33325	-1.22366	10.5745	0.237496	0.0143455	0.0160428	-0.562694
PLE	2018-11-06 18:27:01	0.282488	1.71896e-05	-1.36081	-1.24895	9.62512	0.234642	0.0143623	0.0173545	0.219279
PLE	2018-11-07 09:20:18	0.282471	1.13278e-05	-1.44964	-1.30951	15.8169	0.292915	0.0253031	0.0131431	-0.387227
PLE	2018-11-07 09:44:04	0.282452	1.38159e-05	-1.46648	-1.32472	14.5266	0.198468	0.0179892	0.00966146	-1.0499
PLE	2018-11-07 10:07:53	0.282452	1.49938e-05	-1.49054	-1.34646	12.8129	0.176989	0.0166108	0.00981537	-1.06089
PLE	2018-11-07 10:30:37	0.282488	1.54742e-05	-1.50411	-1.35871	12.7186	0.187844	0.018099	0.0104787	0.218871
PLE	2018-11-07 12:19:27	0.282466	1.68101e-05	-1.51849	-1.3762	10.9342	0.130013	0.012639	0.00843824	-0.56618
PLE	2018-11-07 12:41:43	0.282465	1.55525e-05	-1.52476	-1.38188	10.6124	0.130571	0.0127993	0.00872606	-0.589059
PLE	2018-11-07 13:04:36	0.282493	1.5514e-05	-1.5393	-1.39506	9.66976	0.114575	0.0108858	0.00838117	0.376548
PLE	2018-11-07 13:27:32	0.282462	1.4768e-05	-1.5452	-1.4004	9.33437	0.105993	0.0103664	0.00802232	-0.706973
PLE	2018-11-07 13:50:33	0.282484	1.5479e-05	-1.54433	-1.39961	9.84893	0.0804477	0.00783743	0.00577885	0.0622037
PLE	2018-11-07 15:10:52	0.282491	1.55481e-05	-1.49307	-1.38604	10.7309	0.0896686	0.00845341	0.00590225	0.333555
PLE	2018-11-07 15:33:21	0.282483	1.73789e-05	-1.54794	-1.43697	9.16483	0.0397478	0.00376699	0.00307043	0.0528534
PLE	2018-11-07 15:52:08	0.28244	1.79779e-05	-1.54826	-1.43727	8.34236	0.0691964	0.00665814	0.005882	-1.49502
PLE	2018-11-07 19:06:07	0.282487	1.36621e-05	-1.45419	-1.3416	12.0012	0.227397	0.0162714	0.013437	0.177534
PLE	2018-11-07 19:28:37	0.282484	1.51857e-05	-1.45749	-1.34465	11.4674	0.272753	0.0198143	0.0168045	0.0625721
PLE	2018-11-07 20:02:25	0.282475	1.72207e-05	-1.47356	-1.35947	11.0634	0.23207	0.0167711	0.0149285	-0.265092
PLE	2018-11-07 20:19:53	0.282476	1.77215e-05	-1.46825	-1.35458	10.6064	0.279411	0.0204447	0.0186726	-0.201599
PLE	2018-11-07 20:31:21	0.282494	1.56113e-05	-1.47594	-1.36167	10.8024	0.230545	0.0169205	0.0150861	0.424752
PLE	2018-11-07 20:48:53	0.28249	1.98034e-05	-1.48065	-1.36601	11.1874	0.192363	0.0139921	0.0121749	0.268708
PLE	2018-11-20 15:52:23	0.282465	1.30687e-05	-1.12399	-1.04812	17.9031	0.144767	0.0123174	0.00569363	-0.59907
PLE	2018-11-20 16:04:37	0.28248	1.13946e-05	-1.07683	-1.00414	20.535	0.195453	0.0165917	0.00670889	-0.0732516
PLE	2018-11-20 17:56:00	0.282474	1.4295e-05	-0.970014	-0.882362	12.9414	0.123002	0.010823	0.00666614	-0.299295
PLE	2018-11-20 18:18:53	0.282498	1.30648e-05	-0.943418	-0.858169	12.2999	0.126773	0.0111234	0.00723393	0.557108
PLE	2018-11-20 18:41:42	0.282481	1.41831e-05	-0.912205	-0.829777	11.9701	0.0897548	0.00820192	0.00525317	-0.0268299
PLE	2018-11-20 18:50:43	0.282504	1.72258e-05	-0.909738	-0.827533	11.4094	0.0898627	0.00836357	0.00555237	0.765676
PLE	2018-11-21 09:08:31	0.282474	1.17879e-05	-1.07427	-0.96276	21.3361	0.111449	0.010178	0.00366663	-0.294514
PLE	2018-11-22 10:08:28	0.28246	1.22593e-05	-1.00353	-0.917895	15.663	0.183232	0.0133601	0.00821556	-0.771591
PLE	2018-11-22 10:21:07	0.282462	1.34737e-05	-0.973835	-0.890731	14.314	0.162046	0.0120008	0.00793473	-0.71429
PLE	2018-11-22 10:32:55	0.282428	1.51409e-05	-0.949827	-0.868772	13.8912	0.15541	0.0116326	0.00784526	-1.92324
PLE	2018-11-22 10:40:42	0.282443	1.36131e-05	-0.950176	-0.869092	12.945	0.140208	0.0103148	0.00758956	-1.38097
PLE	2018-11-22 12:31:04	0.282506	1.62074e-05	-0.943036	-0.846275	11.5749	0.126074	0.00935799	0.00767234	0.865954
PLE	2018-11-22 13:11:18	0.282495	1.54263e-05	-0.940059	-0.843604	11.8894	0.136055	0.0101579	0.00801806	0.464661
PLE	2018-11-22 13:26:23	0.282477	1.29597e-05	-0.937782	-0.84156	12.4871	0.134023	0.0101156	0.00752804	-0.185167
PLE	2018-11-22 13:46:03	0.282475	1.66495e-05	-0.951864	-0.854197	11.7925	0.128305	0.00954826	0.00762737	-0.252223
PLE	2018-11-22 14:07:34	0.282471	1.66918e-05	-0.954109	-0.856212	11.045	0.122271	0.00876899	0.00776149	-0.384791
PLE	2018-11-22 14:37:20	0.282456	1.60484e-05	-0.958997	-0.860599	11.9748	0.127257	0.00945231	0.00745885	-0.929158
PLE	2018-11-22 15:27:03	0.282486	1.70905e-05	-0.967789	-0.868489	9.67022	0.0934186	0.00762485	0.00677174	0.148476
PLE	2018-11-22 15:40:07	0.282496	1.40418e-05	-0.960591	-0.862029	11.7714	0.127542	0.00938015	0.00758779	0.484589
PLE	2018-11-22 15:51:29	0.282488	1.48894e-05	-0.962676	-0.863901	11.1933	0.11999	0.00900413	0.00747972	0.22416
PLE	2018-11-25 12:54:17	0.282471	1.14847e-05	-1.29431	-1.17132	16.4492	0.19292	0.0170595	0.00830853	-0.391601
PLE	2018-11-25 13:11:23	0.282444	1.31065e-05	-1.30352	-1.17965	14.94	0.168416	0.0152848	0.0079733	-1.35222
PLE	2018-11-25 13:29:39	0.282482	1.42019e-05	-1.30943	-1.185	15.4853	0.170745	0.0156579	0.00777773	0.0147879
PLE	2018-11-25 13:46:42	0.282451	1.71319e-05	-1.31246	-1.18775	11.7731	0.133895	0.0119009	0.00803216	-1.10378
PLE	2018-11-25 14:03:45	0.282494	1.26599e-05	-1.31079	-1.18623	14.3242	0.159491	0.0150289	0.00790643	0.41173
PLE	2018-11-25 14:22:00	0.282472	1.35307e-05	-1.3213	-1.19575	15.8073	0.182607	0.0163139	0.0081458	-0.340488
PLE	2018-11-25 14:30:32	0.282478	1.39246e-05	-1.3282	-1.20198	13.9818	0.12725	0.01121	0.00642819	-0.124674
PLE	2018-12-05 11:36:24	0.282453	1.23341e-05	-1.26698	-1.10976	17.1459	0.175758	0.0163452	0.00734147	-1.03131
PLE	2018-12-05 11:52:56	0.282442	1.21678e-05	-1.25201	-1.09665	16.7113	0.149054	0.0144282	0.00636395	-1.40559
PLE	2018-12-05 12:10:24	0.282485	1.16093e-05	-1.24298	-1.08874	15.924	0.125017	0.0123586	0.00557902	0.112198
PLE	2018-12-05 12:27:08	0.282459	1.42489e-05	-1.24061	-1.08666	16.3497	0.117334	0.0112992	0.00508668	-0.82273
PLE	2018-12-05 12:43:59	0.282471	1.27954e-05	-1.2357	-1.08237	16.2777	0.138036	0.0130471	0.0060166	-0.382361
PLE	2018-12-05 12:55:13	0.282466	1.19327e-05	-1.23099	-1.07823	16.1761	0.152925	0.0143848	0.00669898	-0.569911
PLE	2018-12-05 14:51:55	0.282454	1.2699e-05	-1.24927	-1.11661	16.8957	0.164828	0.0163837	0.00692316	-0.996798
PLE	2018-12-05 15:08:47	0.282456	1.31177e-05	-1.24355	-1.1115	16.5951	0.166851	0.016485	0.00713878	-0.921383
PLE	2018-12-05 15:26:47	0.282471	1.30712e-05	-1.24318	-1.11116	16.8204	0.149613	0.0147637	0.00629148	-0.406621
PLE	2018-12-05 15:43:55	0.282469	1.20563e-05	-1.24354	-1.11149	16.926	0.145129	0.0142228	0.00606846	-0.446334
PLE	2018-12-05 16:00:59	0.282469	1.34732e-05	-1.24146	-1.10962	16.2863	0.137814	0.0133113	0.0059919	-0.470585
PLE	2018-12-05 16:18:56	0.282459	1.36963e-05	-1.23468	-1.10356	16.2223	0.15261	0.015185	0.00666191	-0.831657
PLE	2018-12-05 18:20:56	0.282465	1.38687e-05	-1.21405	-1.04021	13.256	0.0918695	0.00863895	0.00500956	-0.589711
PLE	2018-12-05 18:38:57	0.282483	1.45634e-05	-1.19815	-1.02659	13.3498	0.100973	0.0100059	0.00544378	0.0371734
PLE	2018-12-05 18:57:02	0.282465	1.49701e-05	-1.18672	-1.0168	13.1103	0.0882525	0.0084276	0.00483883	-0.586966
PLE	2018-12-05 19:14:06	0.282467	1.53856e-05	-1.18358	-1.01411	13.0927	0.0871505	0.00834945	0.004769	-0.52071
PLE	2018-12-05 19:31:00	0.282472	1.39715e-05	-1.1926	-1.02184	13.0505	0.0863503	0.00815104	0.0047461	-0.348762
PLE	2018-12-05 19:48:51	0.282452	1.32162e-05	-1.19785	-1.02634	13.4805	0.0841638	0.00806221	0.00446688	-1.07762
PLE	2018-12-05 21:13:07	0.282443	1.56107e-05	-1.21923	-1.05573	12.5793	0.0872831	0.00813527	0.00498949	-1.39809
PLE	2018-12-05 21:29:54	0.282443	1.36597e-05	-1.22148	-1.05768	13.0078	0.0891829	0.00840187	0.0048933	-1.39008
PLE	2018-12-05 21:47:40	0.282477	1.34878e-05	-1.22422	-1.06005	13.5052	0.0885213	0.008476	0.00466808	-0.178111
PLE	2018-12-05 22:04:26	0.28246	1.42176e-05	-1.22261	-1.05866	13.6028	0.0884964	0.00846959	0.00462868	-0.788296
PLE	2018-12-05 22:21:15	0.282507	1.3552e-05	-1.2219	-1.05804	13.9488	0.0837143	0.00792508	0.00428807	0.871382
PLE	2018-12-05 22:39:00	0.282468	1.49685e-05	-1.22328	-1.05924	13.5935	0.0718159	0.00683521	0.00376397	-0.482557
PLE	2018-12-05 22:55:52	0.282487	1.26872e-05	-1.22294	-1.05895	13.549	0.0653467	0.00613792	0.00345038	0.162148
PLE	2018-12-07 12:02:47	0.282487	1.32168e-05	-1.18605	-1.04994	12.5266	0.0805088	0.00761096	0.00452827	0.165562
PLE	2018-12-07 12:19:43	0.28244	1.32253e-05	-1.1593	-1.02625	13.0282	0.117424	0.0100159	0.00644774	-1.47046
PLE	2018-12-07 12:37:45	0.282436	1.502e-05	-1.14258	-1.01145	12.6335	0.125435	0.0106157	0.00712299	-1.64041
PLE	2018-12-07 12:54:47	0.282438	1.48919e-05	-1.12379	-0.994818	12.7172	0.130333	0.0113778	0.00730189	-1.56589
PLE	2018-12-07 13:11:48	0.28247	1.5327e-05	-1.11224	-0.984591	12.8547	0.117278	0.010243	0.00651057	-0.43153
PLE	2018-12-07 13:29:47	0.28247	1.46979e-05	-1.10009	-0.973842	12.5455	0.115923	0.0101028	0.00656165	-0.43232
PLE	2018-12-07 13:46:43	0.282451	1.28037e-05	-1.08752	-0.962709	12.4542	0.0866217	0.00752702	0.00493359	-1.11438
PLE	2018-12-07 14:01:46	0.282431	1.38409e-05	-1.07585	-0.952383	12.6898	0.106872	0.00975158	0.00592837	-1.81453
PLE	2018-12-20 12:46:39	0.282514	1.67891e-05	-1.49132	-1.33969	10.2968	0.0829416	0.00689708	0.00576765	1.12156
PLE	2018-12-20 13:19:42	0.282516	1.55415e-05	-1.46142	-1.31284	10.4596	0.0855364	0.00737888	0.00583499	1.19237
PLE	2018-12-20 13:54:04	0.282459	1.62387e-05	-1.43173	-1.28617	10.2181	0.0840755	0.0072506	0.00587817	-0.802429
PLE	2018-12-20 15:00:02	0.282468	1.33621e-05	-1.44286	-1.34181	17.1427	0.139357	0.01168	0.00578301	-0.482489
PLE	2018-12-20 15:36:16	0.282473	1.31206e-05	-1.41517	-1.31606	17.8492	0.147854	0.0124789	0.0058938	-0.33393
PLE	2018-12-20 17:37:24	0.282492	1.46321e-05	-1.43565	-1.2851	14.4855	0.132269	0.010242	0.00649965	0.344628
PLE	2018-12-20 18:13:35	0.282482	1.40478e-05	-1.40081	-1.25391	15.1387	0.154315	0.0122539	0.00724874	0.00547023
PLE	2018-12-20 18:46:41	0.282466	1.67864e-05	-1.37771	-1.23324	14.9499	0.118857	0.00969401	0.00562699	-0.575129
PLE	2018-12-20 18:57:43	0.282475	1.55899e-05	-1.38004	-1.23532	14.2714	0.135918	0.0110318	0.0067605	-0.262353
PLE	2018-12-20 19:02:31	0.282473	1.38891e-05	-1.38585	-1.26471	14.5811	0.105149	0.00834147	0.00514815	-0.325686
PLE	2018-12-20 19:33:49	0.282467	1.29497e-05	-1.36618	-1.24676	15.0241	0.0863024	0.00705503	0.0040936	-0.537931
PLE	2018-12-20 20:04:31	0.282472	1.45534e-05	-1.37684	-1.25649	15.0854	0.103012	0.00856853	0.00484053	-0.358818
PLE	2018-12-20 20:20:24	0.28246	1.42705e-05	-1.36728	-1.24776	14.1242	0.0724511	0.00606993	0.00364887	-0.769439
PLE	2018-12-25 09:49:18	0.282439	1.4246e-05	-1.33742	-1.21189	16.0178	0.125358	0.0108917	0.00557482	-1.51774
PLE	2018-12-25 09:54:50	0.282448	1.31529e-05	-1.32913	-1.20437	15.9527	0.120343	0.0104676	0.00537337	-1.20004
PLE	2018-12-25 10:00:21	0.282458	1.34817e-05	-1.32316	-1.19897	15.5924	0.113941	0.0100621	0.00520561	-0.860058
PLE	2018-12-25 10:05:52	0.28245	1.11996e-05	-1.31625	-1.1927	15.8978	0.116757	0.0103104	0.00522344	-1.13304
PLE	2018-12-25 10:11:23	0.282445	1.41093e-05	-1.30431	-1.18189	17.163	0.13564	0.0123141	0.00559087	-1.31237
PLE	2018-12-27 18:48:37	0.282463	1.4196e-05	-1.33411	-1.19905	10.2161	0.136755	0.00861176	0.00947127	-0.675795
PLE	2018-12-27 19:02:25	0.28248	1.48185e-05	-1.32047	-1.18679	10.9037	0.108439	0.00690227	0.00704401	-0.0599119
PLE	2018-12-27 20:57:15	0.282453	2.44712e-05	-1.24404	-1.12297	5.69383	0.0699298	0.00529191	0.00869144	-1.03595
PLE	2018-12-27 21:11:57	0.28248	2.39783e-05	-1.21497	-1.09673	6.92425	0.0828924	0.00537507	0.00845637	-0.0772075
PLE	2018-12-27 21:49:21	0.282459	2.27693e-05	-1.2179	-1.09937	6.91622	0.0756645	0.00489176	0.00772807	-0.798494
QINGHU	2018-11-01 13:28:12	0.282991	1.7188e-05	-1.42939	-1.30408	10.07	0.4636	0.0485778	0.0327079	-0.174044
QINGHU	2018-11-01 13:39:14	0.282966	1.66676e-05	-1.43276	-1.30715	10.3726	0.576941	0.0606101	0.0391507	-1.06864
QINGHU	2018-11-01 13:50:16	0.282967	1.76637e-05	-1.43736	-1.31135	10.0095	0.631974	0.0668057	0.0442398	-1.01474
QINGHU	2018-11-01 14:01:32	0.282999	1.64419e-05	-1.41843	-1.29408	10.7397	0.462949	0.0583598	0.0305519	0.1011
QINGHU	2018-11-01 14:12:49	0.283014	1.89149e-05	-1.42346	-1.29867	11.0152	0.556692	0.0613589	0.035786	0.644702
QINGHU	2018-11-01 14:24:03	0.282982	1.88722e-05	-1.44661	-1.31979	9.91668	0.48144	0.0506604	0.0342436	-0.480921
QINGHU	2018-11-01 14:35:19	0.282978	1.89437e-05	-1.45328	-1.32587	9.76701	0.486251	0.0504366	0.0355331	-0.650857
QINGHU	2018-11-01 14:46:47	0.283012	1.6135e-05	-1.44405	-1.31745	9.84911	0.506232	0.0537037	0.0366373	0.565893
QINGHU	2018-11-01 14:57:53	0.282975	1.9089e-05	-1.44336	-1.31682	9.4798	0.321672	0.0348236	0.0241528	-0.746686
QINGHU	2018-11-01 15:08:04	0.283028	1.66081e-05	-1.4543	-1.3268	9.90589	0.351838	0.0394573	0.0252148	1.14813
QINGHU	2018-11-01 16:41:12	0.282991	1.37748e-05	-1.44186	-1.29728	10.6208	0.293429	0.0320161	0.0197489	-0.164702
QINGHU	2018-11-01 16:52:17	0.283018	1.59009e-05	-1.45217	-1.30655	9.21772	0.373531	0.0406887	0.0287462	0.785859
QINGHU	2018-11-01 17:03:22	0.283	1.64318e-05	-1.42818	-1.28497	9.85286	0.514331	0.0550675	0.0370215	0.141404
QINGHU	2018-11-01 17:14:27	0.283003	1.64513e-05	-1.43031	-1.28688	10.363	0.451545	0.0492987	0.0307434	0.25938
QINGHU	2018-11-01 17:25:31	0.282992	1.74768e-05	-1.46116	-1.31463	9.42797	0.325549	0.0359764	0.0245208	-0.138203
QINGHU	2018-11-02 09:02:43	0.282987	1.68788e-05	-1.44705	-1.29629	10.7438	0.367031	0.0558468	0.0241488	-0.318745
QINGHU	2018-11-02 09:14:53	0.283038	2.06473e-05	-1.5059	-1.34901	7.34484	0.233882	0.0319536	0.0226653	1.48104
QINGHU	2018-11-02 09:33:35	0.283014	2.31729e-05	-1.53492	-1.37501	5.84126	0.219344	0.0353618	0.0268251	0.64947
QINGHU	2018-11-02 09:46:46	0.282959	2.1595e-05	-1.54607	-1.385	6.23595	0.202773	0.0341647	0.0231307	-1.30438
QINGHU	2018-11-02 09:58:06	0.283017	2.36697e-05	-1.55088	-1.38931	5.08567	0.222524	0.0286558	0.0313526	0.746172
QINGHU	2018-11-02 14:36:44	0.283	1.92455e-05	-1.45314	-1.34314	8.2725	0.580922	0.0639514	0.0515322	0.133795
QINGHU	2018-11-02 14:48:45	0.28299	1.71171e-05	-1.46711	-1.35605	9.43918	0.410304	0.0459002	0.0308632	-0.197059
QINGHU	2018-11-02 15:00:46	0.283018	1.71481e-05	-1.47574	-1.36403	9.59604	0.364459	0.042022	0.0268241	0.793011
QINGHU	2018-11-02 15:12:47	0.282985	1.45937e-05	-1.47444	-1.36282	9.91146	0.344216	0.0385867	0.0247256	-0.384428
QINGHU	2018-11-02 15:24:48	0.28298	1.76116e-05	-1.45852	-1.34811	9.59746	0.398965	0.0459708	0.0295049	-0.552824
QINGHU	2018-11-02 15:36:49	0.283007	1.87218e-05	-1.47156	-1.36017	8.74942	0.382678	0.054824	0.030921	0.400286
QINGHU	2018-11-02 17:05:31	0.282992	1.61636e-05	-1.44185	-1.32412	10.7174	0.57795	0.054884	0.0382995	-0.153067
QINGHU	2018-11-02 17:17:32	0.282985	1.90052e-05	-1.42968	-1.31294	8.74614	0.557026	0.0636862	0.0452139	-0.393777
QINGHU	2018-11-02 17:26:47	0.283001	1.73011e-05	-1.45992	-1.34071	9.67729	0.444386	0.0445242	0.0325224	0.18951
QINGHU	2018-11-02 17:36:02	0.283003	1.48587e-05	-1.46025	-1.34102	10.3692	0.588954	0.0587103	0.0402517	0.239785
QINGHU	2018-11-02 19:02:21	0.283009	1.85509e-05	-1.44707	-1.33444	8.71102	0.405776	0.0410381	0.0331553	0.445066
QINGHU	2018-11-02 19:19:17	0.282992	1.80136e-05	-1.45996	-1.34633	9.61267	0.629081	0.0633772	0.0464621	-0.128797
QINGHU	2018-11-02 19:36:12	0.28299	1.82749e-05	-1.45218	-1.33916	9.22692	0.541638	0.0554344	0.042692	-0.225438
QINGHU	2018-11-02 20:02:19	0.282976	1.67409e-05	-1.46716	-1.35297	9.9864	0.447068	0.0465767	0.0316347	-0.698633
QINGHU	2018-11-02 20:19:13	0.283015	1.84479e-05	-1.47657	-1.36165	9.53875	0.470622	0.0490832	0.0359687	0.674449
QINGHU	2018-11-06 18:05:33	0.283046	1.69645e-05	-1.36359	-1.2515	9.99061	1.03675	0.082996	0.0726633	1.76812
QINGHU	2018-11-06 18:14:54	0.283014	1.79527e-05	-1.34155	-1.23127	10.0553	0.589838	0.0490653	0.0414844	0.649306
QINGHU	2018-11-06 18:25:09	0.282957	1.5649e-05	-1.35298	-1.24176	10.1585	0.516325	0.0454315	0.0359878	-1.38898
QINGHU	2018-11-06 18:31:46	0.282989	1.58489e-05	-1.3622	-1.25023	11.5744	0.6041	0.0564484	0.0368994	-0.25348
QINGHU	2018-11-07 09:09:03	0.282999	1.35139e-05	-1.42324	-1.28567	14.8608	0.616891	0.0711419	0.0295146	0.115541
QINGHU	2018-11-07 09:31:50	0.283	1.37049e-05	-1.45077	-1.31054	13.695	0.554237	0.0681605	0.0287312	0.158781
QINGHU	2018-11-07 09:32:46	0.282965	1.231e-05	-1.44831	-1.30831	14.5535	0.500968	0.0623304	0.0244693	-1.09242
QINGHU	2018-11-07 09:56:33	0.283011	1.48188e-05	-1.47977	-1.33672	12.1598	0.448792	0.0570226	0.0261294	0.515582
QINGHU	2018-11-07 10:04:54	0.282988	1.69908e-05	-1.47944	-1.33643	11.4728	0.56052	0.0718679	0.0345271	-0.276144
QINGHU	2018-11-07 10:19:24	0.283015	1.52305e-05	-1.49343	-1.34906	11.2973	0.398924	0.0509736	0.0250549	0.676089
QINGHU	2018-11-07 10:39:12	0.282978	1.71874e-05	-1.5042	-1.35879	10.6017	0.81092	0.103422	0.0555764	-0.630264
QINGHU	2018-11-07 12:08:25	0.282992	1.37028e-05	-1.42777	-1.29397	14.0148	0.667221	0.0768597	0.0337641	-0.140772
QINGHU	2018-11-07 12:30:41	0.283001	1.7061e-05	-1.52916	-1.38587	8.93605	0.318239	0.0416383	0.0252011	0.170072
QINGHU	2018-11-07 12:53:18	0.282958	1.98723e-05	-1.5282	-1.385	8.84205	0.326753	0.0424847	0.0261668	-1.34971
QINGHU	2018-11-07 13:16:02	0.283033	1.82258e-05	-1.5243	-1.38146	8.78055	0.385561	0.050238	0.0308716	1.29707
QINGHU	2018-11-07 13:39:01	0.283003	1.95887e-05	-1.53011	-1.38673	8.51602	0.352166	0.0481262	0.0300469	0.23359
QINGHU	2018-11-07 15:21:58	0.283008	1.97253e-05	-1.52937	-1.41973	7.132	0.236715	0.032507	0.0235362	0.426206
QINGHU	2018-11-07 15:41:41	0.282987	2.0247e-05	-1.5317	-1.4219	7.79995	0.244164	0.0330261	0.0220786	-0.323204
QINGHU	2018-11-07 18:54:53	0.283029	1.75081e-05	-1.44363	-1.33186	10.2152	0.573996	0.0574661	0.0399293	1.15105
QINGHU	2018-11-07 19:11:38	0.282987	1.86382e-05	-1.45847	-1.34555	10.1057	0.649227	0.0656825	0.0454827	-0.314001
QINGHU	2018-11-07 19:34:08	0.282982	1.77589e-05	-1.45459	-1.34197	11.0144	0.506886	0.0520183	0.0324614	-0.490474
QINGHU	2018-11-07 19:39:39	0.282964	1.58967e-05	-1.45232	-1.33988	10.7308	0.720069	0.0723685	0.0471876	-1.14297
QINGHU	2018-11-07 19:50:56	0.282997	1.72986e-05	-1.45941	-1.34642	11.1212	0.514202	0.0527809	0.0327179	0.0463297
QINGHU	2018-11-07 20:08:11	0.282969	1.58505e-05	-1.46203	-1.34883	10.2143	0.348496	0.0376646	0.0241232	-0.944018
QINGHU	2018-11-07 20:25:38	0.283017	1.65431e-05	-1.4661	-1.35259	10.2274	0.412471	0.0435886	0.0287494	0.736563
QINGHU	2018-11-07 20:49:48	0.283014	2.15124e-05	-1.46573	-1.35225	10.8406	0.437825	0.0463162	0.0286748	0.623431
QINGHU	2018-11-20 15:44:43	0.283001	1.08088e-05	-1.14408	-1.06685	22.0498	0.851913	0.108246	0.027219	0.191093
QINGHU	2018-11-20 15:56:12	0.282977	2.00884e-05	-1.08786	-1.01443	16.2928	1.14887	0.138197	0.0504001	-0.675067
QINGHU	2018-11-20 16:08:26	0.282976	1.19039e-05	-1.07596	-1.00333	17.9197	1.03406	0.126965	0.0404202	-0.706203
QINGHU	2018-11-20 16:19:51	0.282968	1.18165e-05	-1.04149	-0.971185	18.1811	1.25427	0.153616	0.0471367	-1.00089
QINGHU	2018-11-20 17:51:28	0.282999	1.31057e-05	-1.01648	-0.924629	16.2223	0.40265	0.0515996	0.0174764	0.118105
QINGHU	2018-11-20 18:05:08	0.282984	1.34496e-05	-0.966985	-0.879607	13.4168	0.43587	0.0551594	0.0227856	-0.416248
QINGHU	2018-11-20 18:23:27	0.282988	1.40216e-05	-0.937787	-0.853047	12.3393	0.324374	0.0402583	0.0183255	-0.267886
QINGHU	2018-11-20 18:37:11	0.283	1.59338e-05	-0.91305	-0.830546	11.3581	0.423156	0.0524938	0.0260053	0.130607
QINGHU	2018-11-20 18:46:13	0.282984	1.60345e-05	-0.887271	-0.807096	11.0767	0.343274	0.0516088	0.0216704	-0.438491
QINGHU	2018-11-20 19:00:30	0.282984	1.70209e-05	-0.896473	-0.815466	9.53145	0.319914	0.0412205	0.0234211	-0.431966
QINGHU	2018-11-20 19:05:46	0.282963	1.62786e-05	-0.902294	-0.820761	10.9934	0.314259	0.041428	0.0200167	-1.17274
QINGHU	2018-11-20 19:10:17	0.283002	2.27434e-05	-0.922171	-0.838843	9.03424	0.300604	0.0388867	0.0233108	0.221202
QINGHU	2018-11-21 09:02:51	0.28301	1.26371e-05	-1.16027	-1.03983	20.1664	0.926565	0.111342	0.0324648	0.493683
QINGHU	2018-11-21 09:23:51	0.282999	1.37691e-05	-0.92049	-0.824943	13.329	0.463151	0.0613736	0.0242595	0.11365
QINGHU	2018-11-21 09:34:17	0.282978	1.6647e-05	-0.874245	-0.783498	10.0707	0.256523	0.033468	0.0177725	-0.635007
QINGHU	2018-11-22 10:03:38	0.282999	1.34954e-05	-1.00383	-0.918168	15.9013	0.757587	0.0820036	0.0334976	0.118088
QINGHU	2018-11-22 10:16:19	0.282996	1.35151e-05	-0.974029	-0.890908	16.4026	0.750077	0.08018	0.0321635	0.0166868
QINGHU	2018-11-22 10:29:00	0.282974	1.55816e-05	-0.96346	-0.881242	14.1398	0.621563	0.0678789	0.0308339	-0.782335
QINGHU	2018-11-22 10:37:44	0.282991	1.86412e-05	-0.954304	-0.872867	13.6358	0.591981	0.0653645	0.030457	-0.187229
QINGHU	2018-11-22 10:44:36	0.282972	1.61205e-05	-0.94617	-0.865427	12.2832	0.510439	0.0586481	0.0290865	-0.850337
QINGHU	2018-11-22 12:38:28	0.283009	1.81653e-05	-0.941061	-0.844503	9.82264	0.430421	0.0472259	0.0309561	0.450475
QINGHU	2018-11-22 12:57:10	0.282999	1.74967e-05	-0.936598	-0.840498	10.4034	0.582306	0.0639236	0.0392328	0.0957455
QINGHU	2018-11-22 13:23:35	0.282977	1.66856e-05	-0.931862	-0.836248	10.3743	0.421558	0.0464949	0.0285439	-0.663867
QINGHU	2018-11-22 13:31:01	0.283026	1.77956e-05	-0.933436	-0.837661	9.09648	0.502949	0.0555778	0.0387236	1.05075
QINGHU	2018-11-22 13:52:32	0.282984	1.63184e-05	-0.934916	-0.838989	10.5215	0.449969	0.0497869	0.0300301	-0.441165
QINGHU	2018-11-22 14:19:33	0.282988	1.63304e-05	-0.936453	-0.840368	10.6835	0.553675	0.062035	0.0363169	-0.2856
QINGHU	2018-11-22 14:48:25	0.282997	1.53442e-05	-0.937368	-0.841189	11.5258	0.511896	0.0572398	0.031128	0.0507644
QINGHU	2018-11-22 15:01:17	0.282977	1.53706e-05	-0.943469	-0.846664	11.3667	0.410959	0.0458659	0.0253083	-0.67368
QINGHU	2018-11-22 15:12:20	0.28301	1.92294e-05	-0.971195	-0.871545	8.32436	0.332819	0.0371873	0.027098	0.507992
QINGHU	2018-11-22 16:07:35	0.28301	1.45442e-05	-0.944783	-0.847843	10.0351	0.478599	0.0525486	0.0334172	0.477539
QINGHU	2018-11-22 16:14:05	0.283004	1.52389e-05	-0.949252	-0.851854	10.186	0.678919	0.0729705	0.046698	0.298844
QINGHU	2018-11-22 16:21:30	0.28299	1.75132e-05	-0.94739	-0.850183	11.813	0.341675	0.0389902	0.0202702	-0.212995
QINGHU	2018-11-25 12:42:50	0.28298	1.21727e-05	-1.27969	-1.15808	14.5418	0.458958	0.058321	0.0222758	-0.552158
QINGHU	2018-11-25 12:59:55	0.283015	1.24446e-05	-1.2919	-1.16914	15.0679	0.532916	0.0660512	0.0250975	0.660215
QINGHU	2018-11-25 13:18:15	0.282995	1.53376e-05	-1.2871	-1.16479	14.7937	0.585572	0.0753172	0.0279101	-0.024436
QINGHU	2018-11-25 13:41:04	0.282995	1.50903e-05	-1.28879	-1.16632	13.6065	0.784025	0.0980891	0.0400203	-0.0258086
QINGHU	2018-11-25 13:58:07	0.283007	1.43578e-05	-1.30585	-1.18176	15.2296	0.324214	0.0421161	0.0150692	0.405346
QINGHU	2018-11-25 14:10:36	0.282982	1.46867e-05	-1.31005	-1.18556	12.7456	0.410824	0.0517034	0.0227744	-0.501072
QINGHU	2018-11-25 14:46:30	0.283004	1.58369e-05	-1.29532	-1.17223	13.5459	0.598818	0.0757288	0.0312806	0.281502
QINGHU	2018-12-05 11:25:22	0.283	1.12982e-05	-1.28367	-1.12438	19.6482	0.598077	0.0830066	0.0215649	0.142917
QINGHU	2018-12-05 11:41:54	0.283024	1.64114e-05	-1.2596	-1.1033	11.8812	0.504941	0.0740353	0.0304263	0.990862
QINGHU	2018-12-05 11:58:27	0.283002	1.25593e-05	-1.24761	-1.09279	15.6979	0.4455	0.0627238	0.0200748	0.22922
QINGHU	2018-12-05 11:59:22	0.282996	1.1316e-05	-1.24726	-1.09248	16.3752	0.391234	0.0553364	0.0170206	-0.0173549
QINGHU	2018-12-05 12:15:55	0.282952	1.33561e-05	-1.23942	-1.08562	14.0438	0.287392	0.0390582	0.0145561	-1.55965
QINGHU	2018-12-05 12:32:48	0.283003	1.47255e-05	-1.23953	-1.08572	15.5785	0.493545	0.0669774	0.0224663	0.238798
QINGHU	2018-12-05 12:49:36	0.283011	1.38006e-05	-1.24993	-1.09483	13.596	0.956324	0.124948	0.0489411	0.519738
QINGHU	2018-12-05 12:59:55	0.283036	1.77781e-05	-1.23683	-1.08335	18.3575	0.579434	0.0851089	0.0221592	1.41191
QINGHU	2018-12-05 14:40:47	0.283022	1.36482e-05	-1.23036	-1.0997	13.0703	0.403037	0.0517204	0.0217593	0.92317
QINGHU	2018-12-05 14:57:34	0.283012	2.6556e-05	-1.25429	-1.12109	5.94536	0.237851	0.0393516	0.0287162	0.559661
QINGHU	2018-12-05 15:14:27	0.282997	1.38527e-05	-1.236	-1.10474	15.4684	0.459341	0.0656198	0.0209672	0.0520216
QINGHU	2018-12-05 15:15:22	0.282987	1.31423e-05	-1.24157	-1.10973	14.3071	0.380536	0.0536586	0.0188248	-0.333876
QINGHU	2018-12-05 15:32:26	0.282974	1.12265e-05	-1.24779	-1.11528	16.0014	0.499355	0.0709639	0.0221242	-0.78829
QINGHU	2018-12-05 15:49:35	0.282983	1.41924e-05	-1.2417	-1.10984	13.8289	0.509853	0.070762	0.0260961	-0.442781
QINGHU	2018-12-05 16:06:33	0.282993	1.77345e-05	-1.24203	-1.11014	13.5338	0.814859	0.110041	0.0423657	-0.0956164
QINGHU	2018-12-05 16:07:29	0.283006	1.70333e-05	-1.23798	-1.10652	13.5543	0.553769	0.0772579	0.0288763	0.358973
QINGHU	2018-12-05 16:25:28	0.283036	4.12708e-05	-1.25314	-1.12006	12.6805	0.512935	0.0710755	0.0280147	1.41732
QINGHU	2018-12-05 18:10:24	0.283004	1.51379e-05	-1.24795	-1.06926	12.3436	0.386523	0.0509741	0.0227203	0.290644
QINGHU	2018-12-05 18:27:30	0.282993	1.56362e-05	-1.20382	-1.03145	12.3652	0.199159	0.0294208	0.0117287	-0.119704
QINGHU	2018-12-05 18:44:38	0.283017	1.46423e-05	-1.18532	-1.0156	13.2415	0.437711	0.0618518	0.023755	0.736515
QINGHU	2018-12-05 18:45:33	0.282995	1.48195e-05	-1.17763	-1.00901	11.5715	0.506532	0.067502	0.0313445	-0.0362111
QINGHU	2018-12-05 19:02:43	0.283002	1.74442e-05	-1.18306	-1.01366	12.4614	0.412878	0.0560905	0.0237635	0.206026
QINGHU	2018-12-05 19:19:40	0.283034	1.79899e-05	-1.18883	-1.01861	13.3534	0.542657	0.080288	0.0289343	1.34436
QINGHU	2018-12-05 19:36:33	0.282979	1.67747e-05	-1.18704	-1.01707	12.4939	0.391713	0.0530198	0.0229641	-0.611777
QINGHU	2018-12-05 19:37:28	0.282975	1.64254e-05	-1.18898	-1.01874	12.6048	0.417598	0.0578059	0.0237305	-0.730559
QINGHU	2018-12-05 19:55:20	0.282984	1.55601e-05	-1.1922	-1.02149	12.3144	0.397979	0.0614525	0.0231447	-0.431666
QINGHU	2018-12-05 21:02:05	0.283015	1.52193e-05	-1.32666	-1.14875	11.9204	0.303218	0.0425237	0.0179745	0.670554
QINGHU	2018-12-05 21:18:38	0.283001	1.53262e-05	-1.21696	-1.05377	12.0161	0.538816	0.0761255	0.0318947	0.163829
QINGHU	2018-12-05 21:35:33	0.283024	1.63074e-05	-1.2181	-1.05475	12.2735	0.581562	0.0857745	0.033873	0.983606
QINGHU	2018-12-05 21:36:28	0.282998	1.9596e-05	-1.20798	-1.04599	14.0078	0.47956	0.0729881	0.02448	0.0713214
QINGHU	2018-12-05 21:53:17	0.282994	1.47007e-05	-1.21649	-1.05336	13.6745	0.396468	0.0600078	0.020752	-0.0681581
QINGHU	2018-12-05 22:10:04	0.282964	1.43691e-05	-1.2137	-1.05094	11.4715	0.376729	0.0506253	0.0237104	-1.13888
QINGHU	2018-12-05 22:26:53	0.282985	1.24e-05	-1.21121	-1.04879	13.9991	0.432553	0.0626731	0.022105	-0.399002
QINGHU	2018-12-05 22:27:49	0.282997	1.44465e-05	-1.21795	-1.05462	13.0142	0.329488	0.0532036	0.0179699	0.028485
QINGHU	2018-12-05 22:44:39	0.282979	1.53162e-05	-1.21794	-1.05461	11.5746	0.31518	0.0424234	0.0194898	-0.595829
QINGHU	2018-12-07 12:08:21	0.28301	1.47136e-05	-1.17176	-1.03728	13.6144	0.60163	0.0745701	0.0311757	0.493855
QINGHU	2018-12-07 12:26:19	0.282996	1.40482e-05	-1.13284	-1.00283	13.8791	0.518286	0.0663434	0.0263769	0.00747152
QINGHU	2018-12-07 12:43:22	0.282966	1.51228e-05	-1.14268	-1.01154	13.7735	0.328652	0.0426694	0.0167962	-1.06503
QINGHU	2018-12-07 13:00:24	0.282997	1.386e-05	-1.13033	-1.00061	13.1635	0.312005	0.0402112	0.0166989	0.0280002
QINGHU	2018-12-07 13:17:23	0.282991	1.34947e-05	-1.11586	-0.987801	12.7544	0.398294	0.0506475	0.0220733	-0.184606
QINGHU	2018-12-07 13:35:22	0.283	1.24857e-05	-1.09905	-0.972922	13.5155	0.334138	0.0473392	0.0174538	0.133663
QINGHU	2018-12-07 13:52:17	0.282984	1.62021e-05	-1.1101	-0.982697	11.059	0.525878	0.0785011	0.0339573	-0.434432
QINGHU	2018-12-07 14:07:26	0.282969	2.01918e-05	-1.06431	-0.942165	11.1175	0.323648	0.0399832	0.0205067	-0.968153
QINGHU	2018-12-20 12:42:02	0.282998	1.85092e-05	-1.47672	-1.32658	9.07097	0.422281	0.0509029	0.0330475	0.0728764
QINGHU	2018-12-20 12:57:42	0.282958	1.66542e-05	-1.47281	-1.32307	9.15372	0.346428	0.0411129	0.0271319	-1.33061
QINGHU	2018-12-20 13:14:00	0.282979	1.70213e-05	-1.46851	-1.31921	9.45664	0.306886	0.0371992	0.0230828	-0.61633
QINGHU	2018-12-20 13:31:09	0.283029	1.93946e-05	-1.45176	-1.30416	8.77958	0.397337	0.0481728	0.0319975	1.16251
QINGHU	2018-12-20 13:48:23	0.283014	1.91102e-05	-1.44522	-1.29829	9.78453	0.417861	0.0529727	0.0302512	0.652644
QINGHU	2018-12-20 14:12:13	0.282966	1.2845e-05	-1.44521	-1.34399	17.9016	0.785303	0.100429	0.0313198	-1.07156
QINGHU	2018-12-20 14:23:37	0.282981	1.50729e-05	-1.43471	-1.33423	17.2767	0.756553	0.0909979	0.0310641	-0.528969
QINGHU	2018-12-20 14:38:02	0.282989	1.13981e-05	-1.46021	-1.35794	18.8842	0.74682	0.0894004	0.0281553	-0.247064
QINGHU	2018-12-20 14:54:19	0.282995	1.32205e-05	-1.43806	-1.33734	18.2471	0.963028	0.124421	0.0375236	-0.0269492
QINGHU	2018-12-20 15:11:31	0.283044	1.63388e-05	-1.68956	-1.57123	12.9678	0.616784	0.0682835	0.0338277	1.70439
QINGHU	2018-12-20 15:29:39	0.282991	1.67619e-05	-1.41724	-1.31799	15.7998	0.817334	0.109184	0.0350055	-0.184741
QINGHU	2018-12-20 15:42:57	0.283002	1.38001e-05	-1.40306	-1.3048	19.0797	0.758186	0.1096	0.0281988	0.206703
QINGHU	2018-12-20 17:32:47	0.283027	1.7115e-05	-1.44529	-1.29372	13.0471	0.655348	0.0729605	0.0355425	1.07863
QINGHU	2018-12-20 17:51:17	0.283014	1.65037e-05	-1.4244	-1.27503	13.9711	0.635614	0.0725714	0.032241	0.646966
QINGHU	2018-12-20 18:08:05	0.282991	1.72258e-05	-1.40978	-1.26194	12.6708	0.607807	0.0668154	0.0341596	-0.191327
QINGHU	2018-12-20 18:24:37	0.283024	1.73342e-05	-1.39242	-1.2464	12.5614	0.934604	0.100961	0.0540901	0.975104
QINGHU	2018-12-20 18:37:29	0.282955	1.76476e-05	-1.38405	-1.23891	13.6821	0.407525	0.0465827	0.0210353	-1.44306
QINGHU	2018-12-20 18:41:10	0.282998	1.6967e-05	-1.3805	-1.23573	14.396	0.527471	0.0616792	0.0259676	0.0877304
QINGHU	2018-12-20 18:53:07	0.282996	1.73001e-05	-1.37047	-1.22676	16.4949	0.588945	0.0742239	0.0253049	0.0144471
QINGHU	2018-12-20 19:12:38	0.282988	1.47031e-05	-1.37539	-1.25517	14.0265	0.462527	0.0548609	0.0232857	-0.277523
QINGHU	2018-12-20 19:28:18	0.283012	1.48078e-05	-1.38311	-1.2622	13.8437	0.549786	0.0641259	0.0280841	0.55421
QINGHU	2018-12-20 19:46:47	0.283007	1.45423e-05	-1.37348	-1.25342	16.3572	0.585372	0.0724484	0.0253624	0.400049
QINGHU	2018-12-20 20:03:36	0.282992	1.49888e-05	-1.36202	-1.24296	14.6995	0.525564	0.0633139	0.0251557	-0.145576
QINGHU	2018-12-20 20:14:48	0.282991	1.41943e-05	-1.36565	-1.24627	13.8542	0.429753	0.050358	0.0219536	-0.186194
QINGHU	2018-12-20 20:30:45	0.282995	1.46431e-05	-1.34434	-1.22683	13.9552	0.620767	0.0741404	0.0314584	-0.0237823
QINGHU	2018-12-20 20:35:20	0.282977	1.41736e-05	-1.35237	-1.23415	13.5543	0.640267	0.0752907	0.0333889	-0.668158
QINGHU	2018-12-25 09:47:28	0.282996	1.48436e-05	-1.32922	-1.20445	11.7754	0.51075	0.0590603	0.0306132	0.0118742
QINGHU	2018-12-25 09:52:59	0.282998	1.83762e-05	-1.32433	-1.20003	11.0874	0.436797	0.0501489	0.0278433	0.0568912
QINGHU	2018-12-25 09:58:31	0.283011	1.80149e-05	-1.32314	-1.19895	11.5207	0.549404	0.076741	0.0336563	0.545038
QINGHU	2018-12-25 10:04:02	0.282975	1.70175e-05	-1.31088	-1.18784	12.7132	0.493355	0.072449	0.0272889	-0.750246
QINGHU	2018-12-25 10:09:33	0.283029	1.76664e-05	-1.28781	-1.16694	11.2178	0.481209	0.0544691	0.0305095	1.15971
QINGHU	2018-12-25 10:15:04	0.282989	1.9028e-05	-1.28617	-1.16545	9.59749	0.661101	0.0911791	0.049108	-0.237257
QINGHU	2018-12-27 18:37:35	0.283006	2.19625e-05	-1.34437	-1.20827	7.96345	0.606146	0.0504038	0.0539274	0.353823
QINGHU	2018-12-27 18:53:13	0.282975	2.13104e-05	-1.33327	-1.19829	8.74959	0.470392	0.0404226	0.0382007	-0.730723
QINGHU	2018-12-27 19:10:41	0.283002	1.98586e-05	-1.31241	-1.17955	8.38412	0.432549	0.0369887	0.0366796	0.218343
QINGHU	2018-12-27 19:21:44	0.282989	2.13923e-05	-1.30487	-1.17277	7.99239	0.404458	0.0342857	0.036017	-0.263642
QINGHU	2018-12-27 19:30:55	0.282992	2.08492e-05	-1.29715	-1.16583	7.26689	0.451473	0.0387847	0.0442657	-0.156342
QINGHU	2018-12-27 20:46:13	0.282998	2.51628e-05	-1.2216	-1.10272	6.52417	0.454648	0.0429528	0.0490136	0.0555984
QINGHU	2018-12-27 21:23:55	0.283019	2.56102e-05	-1.21333	-1.09525	5.44405	0.344851	0.0302963	0.0447279	0.797307
QINGHU	2018-12-27 21:28:30	0.283005	2.62e-05	-1.21446	-1.09627	6.13831	0.434135	0.0378885	0.0500842	0.323714
QINGHU	2018-12-27 21:40:50	0.282967	2.33627e-05	-1.21974	-1.10103	6.2367	0.4354	0.037553	0.049327	-1.02971
QINGHU	2018-12-27 21:56:52	0.282993	2.6408e-05	-1.21659	-1.09819	5.85015	0.445459	0.0379358	0.0538425	-0.102177
QINGHU	2018-12-27 22:10:03	0.283035	2.6634e-05	-1.21346	-1.09537	6.00287	0.401794	0.0348309	0.047666	1.37895
QINGHU	2018-12-27 22:15:38	0.282988	2.31366e-05	-1.20862	-1.091	6.09971	0.312614	0.0268922	0.0365298	-0.278434
TEMORA-2	2018-10-16 11:07:54	0.282674	2.00762e-05	-1.55011	-1.43553	8.13442	0.471279	0.0468139	0.0416692	-0.0901046
TEMORA-2	2018-10-16 11:24:47	0.282687	2.05012e-05	-1.53371	-1.42034	8.33125	0.687881	0.0670488	0.0592496	0.336918
TEMORA-2	2018-10-16 11:38:27	0.282646	1.75535e-05	-1.5078	-1.39635	9.71323	0.585153	0.0614027	0.0431892	-1.09124
TEMORA-2	2018-10-16 12:10:26	0.282662	1.60389e-05	-1.52714	-1.40252	12.265	1.51616	0.153973	0.0888963	-0.540387
TEMORA-2	2018-10-16 12:25:04	0.282659	1.45971e-05	-1.48572	-1.36448	13.1727	1.71941	0.171372	0.0931828	-0.629849
TEMORA-2	2018-10-16 12:36:47	0.282701	1.42759e-05	-1.46533	-1.34575	13.9536	1.39459	0.153565	0.0711141	0.844395
TEMORA-2	2018-10-16 12:58:31	0.282695	1.73409e-05	-1.49429	-1.36935	15.3071	1.60029	0.184832	0.0745861	0.629762
TEMORA-2	2018-10-16 13:09:16	0.282677	1.45832e-05	-1.45053	-1.32925	14.0735	1.27536	0.149539	0.0644066	0.00393115
TEMORA-2	2018-10-16 13:24:49	0.282655	1.31872e-05	-1.43064	-1.31102	14.5615	1.49407	0.179579	0.07249	-0.792055
TEMORA-2	2018-10-16 14:00:02	0.282701	1.52705e-05	-1.47871	-1.33437	13.534	1.08093	0.113253	0.0571772	0.850466
TEMORA-2	2018-10-16 14:16:42	0.282667	1.25155e-05	-1.40167	-1.26485	13.6654	0.506851	0.0572739	0.0263582	-0.346683
TEMORA-2	2018-10-16 14:29:11	0.282687	1.3036e-05	-1.38695	-1.25156	14.0283	0.549244	0.0631939	0.0278254	0.360255
TEMORA-2	2018-10-16 14:32:54	0.28267	1.47375e-05	-1.38427	-1.24915	12.4895	0.630936	0.0671468	0.035886	-0.243343
TEMORA-2	2018-10-16 14:43:06	0.282668	1.46394e-05	-1.37419	-1.24006	12.186	0.818325	0.0853806	0.0477629	-0.301391
TEMORA-2	2018-10-16 14:56:50	0.282666	1.58825e-05	-1.37486	-1.24066	11.7126	0.704483	0.073279	0.042678	-0.390128
TEMORA-2	2018-10-16 15:25:59	0.282652	1.48647e-05	-1.40853	-1.2736	13.5125	1.0259	0.120037	0.0540847	-0.890121
TEMORA-2	2018-10-16 15:32:41	0.282651	1.48837e-05	-1.36213	-1.23164	12.5797	1.30344	0.139078	0.0736436	-0.915834
TEMORA-2	2018-10-16 15:38:13	0.282674	1.56554e-05	-1.35824	-1.22812	13.0388	1.04196	0.114897	0.0567358	-0.0981698
TEMORA-2	2018-10-16 15:52:58	0.282695	1.51394e-05	-1.34875	-1.21955	12.9943	1.6058	0.172018	0.0866703	0.620082
TEMORA-2	2018-10-16 16:04:18	0.282682	1.65154e-05	-1.34583	-1.2169	11.9397	1.38689	0.146164	0.0836672	0.168688
TEMORA-2	2018-10-16 16:21:14	0.28272	1.44339e-05	-1.33996	-1.2116	12.9407	1.63775	0.177097	0.0887502	1.52634
TEMORA-2	2018-10-16 16:47:21	0.282689	1.65793e-05	-1.36491	-1.24188	12.8227	0.413795	0.0452179	0.0230465	0.436653
TEMORA-2	2018-10-16 17:00:19	0.282659	1.6585e-05	-1.33095	-1.21098	11.0187	0.932021	0.102571	0.06036	-0.653265
TEMORA-2	2018-10-16 17:14:10	0.282662	1.66228e-05	-1.33282	-1.21268	10.552	0.952385	0.102613	0.0642602	-0.521758
TEMORA-2	2018-10-16 17:24:47	0.282662	2.01136e-05	-1.32026	-1.20125	10.7314	0.964133	0.100429	0.0640308	-0.5259
TEMORA-2	2018-10-16 17:31:30	0.28268	2.02992e-05	-1.3093	-1.19128	10.2081	0.48422	0.0563961	0.0338096	0.103875
TEMORA-2	2018-10-16 17:38:12	0.282682	1.81248e-05	-1.32255	-1.20333	12.062	1.06532	0.116497	0.062753	0.163993
TEMORA-2	2018-10-16 18:06:58	0.28269	1.29654e-05	-1.34615	-1.21296	10.8786	0.779601	0.0859975	0.0510742	0.454388
TEMORA-2	2018-10-16 18:13:44	0.28269	1.70808e-05	-1.32753	-1.19619	10.2921	0.899811	0.0956901	0.0621087	0.44849
TEMORA-2	2018-10-16 18:20:27	0.28265	1.64482e-05	-1.32273	-1.19186	10.1093	1.07688	0.114578	0.0753813	-0.961007
TEMORA-2	2018-10-16 18:27:05	0.282687	1.88609e-05	-1.31794	-1.18754	10.0835	0.738602	0.0789339	0.0520908	0.363163
TEMORA-2	2018-10-16 18:40:21	0.282659	1.92408e-05	-1.32074	-1.19007	9.88808	0.704862	0.0759383	0.0505945	-0.643438
TEMORA-2	2018-10-16 18:57:20	0.282674	1.81847e-05	-1.31019	-1.18056	9.50725	0.654182	0.0692295	0.0493327	-0.123222
TEMORA-2	2018-10-16 19:49:42	0.28268	1.93821e-05	-1.31457	-1.1676	9.02813	0.974719	0.100193	0.0770947	0.0987339
TEMORA-2	2018-10-16 19:57:17	0.282685	1.87544e-05	-1.31575	-1.16865	8.99945	0.802933	0.0871736	0.0635133	0.276083
TEMORA-2	2018-10-16 20:09:33	0.282688	1.92331e-05	-1.30899	-1.16264	8.64637	0.572945	0.0646308	0.0470683	0.379111
TEMORA-2	2018-10-16 20:20:48	0.282662	1.78673e-05	-1.30547	-1.15951	8.96814	0.751406	0.0786467	0.0594645	-0.518749
TEMORA-2	2018-10-16 20:33:01	0.282656	1.90172e-05	-1.30514	-1.15923	8.77437	0.646618	0.0677282	0.0522199	-0.734975
TEMORA-2	2018-10-16 20:40:37	0.282665	1.89366e-05	-1.30527	-1.15934	9.70436	1.00379	0.109564	0.0732267	-0.433786
TEMORA-2	2018-10-17 11:08:42	0.282673	1.78603e-05	-1.51076	-1.39821	9.76291	0.431201	0.0427052	0.0315598	-0.157058
TEMORA-2	2018-10-17 11:22:48	0.282656	1.76401e-05	-1.52614	-1.41245	9.22252	0.541476	0.0560345	0.0419681	-0.735598
TEMORA-2	2018-10-17 11:36:51	0.28268	1.9859e-05	-1.53798	-1.4234	9.59406	0.971484	0.0959441	0.072205	0.101777
TEMORA-2	2018-10-17 11:45:23	0.282642	2.2382e-05	-1.54444	-1.42938	8.44612	1.26875	0.120911	0.106858	-1.22077
TEMORA-2	2018-10-17 11:57:37	0.282637	1.75548e-05	-1.55546	-1.43958	8.94791	0.66307	0.0698239	0.0528649	-1.41223
TEMORA-2	2018-10-17 12:12:15	0.282683	1.7442e-05	-1.57292	-1.45574	9.00625	0.749034	0.0798768	0.059398	0.215764
TEMORA-2	2018-10-17 12:18:02	0.282641	1.91953e-05	-1.57229	-1.45515	9.26337	0.543639	0.0571714	0.0418506	-1.28821
TEMORA-2	2018-10-17 12:21:43	0.282701	1.80222e-05	-1.5706	-1.45359	9.30654	0.74702	0.074121	0.0572868	0.853149
TEMORA-2	2018-10-17 12:31:31	0.282671	1.80976e-05	-1.57682	-1.45935	9.62976	1.03836	0.104803	0.0770354	-0.216465
TEMORA-2	2018-10-17 12:35:11	0.282689	1.79973e-05	-1.57805	-1.46049	9.59291	0.941677	0.100163	0.0700142	0.434168
TEMORA-2	2018-10-17 12:38:52	0.282684	1.74073e-05	-1.58739	-1.46913	9.01892	0.536872	0.058661	0.0423961	0.239453
TEMORA-2	2018-10-17 12:42:32	0.282709	2.55875e-05	-1.58252	-1.46463	9.25413	0.491551	0.0542214	0.0377631	1.13159
TEMORA-2	2018-10-17 13:58:47	0.282648	1.81548e-05	-1.50711	-1.38961	8.68307	0.533994	0.0491838	0.0439745	-1.02302
TEMORA-2	2018-10-17 14:10:08	0.282693	1.81885e-05	-1.54176	-1.42157	8.97686	0.224033	0.0223114	0.0178203	0.554525
TEMORA-2	2018-10-17 14:21:27	0.282708	1.99544e-05	-1.5744	-1.45166	8.21477	1.15337	0.116814	0.100101	1.08382
TEMORA-2	2018-10-17 14:24:29	0.282672	1.94417e-05	-1.5795	-1.45636	8.19028	0.652419	0.062421	0.0567137	-0.175973
TEMORA-2	2018-10-17 14:33:04	0.282641	3.01987e-05	-1.60524	-1.4801	9.48607	0.922873	0.0900492	0.0696403	-1.25701
TEMORA-2	2018-10-17 14:38:51	0.282715	1.93693e-05	-1.60323	-1.47825	8.19371	0.496981	0.0484652	0.0433346	1.33594
TEMORA-2	2018-10-17 14:50:08	0.282684	1.77161e-05	-1.6153	-1.48938	9.79096	0.836279	0.0948006	0.0608193	0.245548
TEMORA-2	2018-10-17 14:55:53	0.282635	1.83693e-05	-1.61981	-1.49353	8.7439	0.271163	0.0281351	0.0221594	-1.50251
TEMORA-2	2018-10-17 15:06:15	0.282663	1.7425e-05	-1.62704	-1.50019	8.92023	0.29407	0.0313452	0.0235301	-0.508766
TEMORA-2	2018-10-17 16:47:42	0.282728	2.75348e-05	-1.6114	-1.4748	8.33691	1.22674	0.118286	0.105044	1.82178
TEMORA-2	2018-10-17 17:00:25	0.282657	1.94405e-05	-1.64449	-1.50509	8.45944	0.455411	0.048452	0.0385674	-0.694405
TEMORA-2	2018-10-17 17:14:27	0.282667	2.22405e-05	-1.6578	-1.51728	7.91136	0.270708	0.0278224	0.0245359	-0.350676
TEMORA-2	2018-10-17 17:27:09	0.282695	2.33735e-05	-1.65904	-1.51841	7.57927	0.807974	0.0953605	0.0754247	0.643742
TEMORA-2	2018-10-17 17:41:15	0.282664	1.80462e-05	-1.67569	-1.53364	8.30496	0.767062	0.0791436	0.066005	-0.458516
TEMORA-2	2018-10-17 17:54:01	0.28267	1.9724e-05	-1.67451	-1.53257	9.23489	0.580278	0.0605661	0.0453461	-0.241208
TEMORA-2	2018-10-17 18:07:58	0.282713	1.79976e-05	-1.67914	-1.5368	9.17074	0.974451	0.0980614	0.0762632	1.27205
TEMORA-2	2018-10-17 18:20:38	0.282666	1.82139e-05	-1.67879	-1.53648	8.95799	0.64139	0.0631846	0.0517828	-0.405084
TEMORA-2	2018-10-17 19:16:20	0.282664	2.27531e-05	-1.55289	-1.42714	7.63482	0.922338	0.0822011	0.0864466	-0.467947
TEMORA-2	2018-10-17 19:30:05	0.282694	2.25067e-05	-1.67639	-1.54065	7.70067	0.842521	0.0861142	0.0787548	0.600254
TEMORA-2	2018-10-17 19:42:35	0.282671	1.99076e-05	-1.6787	-1.54277	8.26831	0.917544	0.0944328	0.0794979	-0.221161
TEMORA-2	2018-10-17 19:56:21	0.282677	2.02272e-05	-1.68567	-1.54917	7.94594	0.929396	0.0939798	0.0839755	0.00378362
TEMORA-2	2018-10-17 20:08:50	0.282646	2.07194e-05	-1.69591	-1.55859	8.20978	1.07884	0.107373	0.0942771	-1.08258
TEMORA-2	2018-10-17 20:22:35	0.282699	1.77071e-05	-1.7001	-1.56244	8.37176	0.838842	0.0905919	0.071767	0.761838
TEMORA-2	2018-10-17 20:35:06	0.282663	1.97654e-05	-1.68768	-1.55102	7.67316	0.584311	0.0591792	0.054612	-0.500391
TEMORA-2	2018-10-18 12:21:32	0.282646	2.25935e-05	-1.32388	-1.21489	5.82319	0.46294	0.0513749	0.0565794	-1.09154
TEMORA-2	2018-10-18 12:39:19	0.282699	3.5476e-05	-1.37008	-1.25729	4.30599	0.361304	0.0412344	0.0597899	0.79317
TEMORA-2	2018-10-18 13:19:42	0.282692	2.23648e-05	-1.50752	-1.38761	7.28627	1.08512	0.092332	0.106042	0.5362
TEMORA-2	2018-10-18 13:29:11	0.282686	1.8042e-05	-1.50623	-1.38642	8.22009	0.385344	0.0377116	0.0334459	0.3198
TEMORA-2	2018-10-18 13:46:57	0.282661	1.96031e-05	-1.51004	-1.38993	7.76815	1.01873	0.0915427	0.0938611	-0.57161
TEMORA-2	2018-10-18 14:03:45	0.282683	1.87555e-05	-1.49263	-1.3739	7.84271	0.88755	0.0799	0.0808362	0.222193
TEMORA-2	2018-10-18 14:21:30	0.282678	2.11253e-05	-1.49357	-1.37476	9.11862	0.824656	0.0854552	0.0644671	0.0456686
TEMORA-2	2018-10-18 14:41:03	0.282653	2.05065e-05	-1.49314	-1.37437	7.68761	0.868859	0.0857933	0.0810968	-0.832454
TEMORA-2	2018-10-18 15:59:11	0.282717	2.36822e-05	-1.53192	-1.40811	6.99157	0.409102	0.0347222	0.0419649	1.41691
TEMORA-2	2018-10-18 16:16:21	0.282692	1.94763e-05	-1.48346	-1.36357	8.28655	0.735576	0.0694083	0.0632404	0.537907
TEMORA-2	2018-10-18 16:34:41	0.282661	2.1002e-05	-1.47621	-1.3569	7.99398	0.399411	0.0393464	0.0357527	-0.563527
TEMORA-2	2018-10-18 16:51:47	0.28268	2.2359e-05	-1.46569	-1.34723	7.06717	0.369654	0.03667	0.0373512	0.11602
TEMORA-2	2018-10-18 17:10:06	0.282632	2.14347e-05	-1.45527	-1.33765	6.89573	0.419912	0.041875	0.0438766	-1.58705
TEMORA-2	2018-10-18 17:27:09	0.282652	2.32821e-05	-1.46472	-1.34634	6.98907	0.679038	0.0658063	0.0695134	-0.888769
TEMORA-2	2018-10-18 17:56:05	0.282682	2.05588e-05	-1.47533	-1.3561	6.88412	0.573862	0.0552669	0.0595039	0.173629
TEMORA-2	2018-10-18 18:23:28	0.282717	2.17529e-05	-1.54614	-1.43114	8.25977	1.61447	0.144089	0.139081	1.40488
TEMORA-2	2018-10-18 18:41:31	0.282638	1.95541e-05	-1.50758	-1.39545	9.09394	0.959002	0.0885924	0.075473	-1.37765
TEMORA-2	2018-10-18 18:58:22	0.282689	2.64789e-05	-1.47751	-1.36761	7.6087	1.83021	0.203157	0.173505	0.441342
TEMORA-2	2018-11-01 13:23:36	0.282668	2.46363e-05	-1.42613	-1.3011	8.47755	1.89395	0.18053	0.159843	-0.314949
TEMORA-2	2018-11-01 13:33:43	0.282672	1.78182e-05	-1.4232	-1.29843	11.6829	1.36896	0.141826	0.0836283	-0.189711
TEMORA-2	2018-11-01 13:44:46	0.282659	1.73823e-05	-1.436	-1.31011	10.1741	0.780072	0.0804615	0.0547965	-0.654174
TEMORA-2	2018-11-01 13:55:54	0.282667	2.16837e-05	-1.44122	-1.31487	8.73758	0.80466	0.0847575	0.0652755	-0.368018
TEMORA-2	2018-11-01 14:07:10	0.282649	1.70611e-05	-1.43683	-1.31086	9.59988	0.860143	0.0901467	0.0638436	-0.988743
TEMORA-2	2018-11-01 14:18:26	0.282644	1.45691e-05	-1.45031	-1.32317	10.4242	0.439305	0.0505918	0.0299948	-1.17987
TEMORA-2	2018-11-01 14:29:41	0.282637	1.63939e-05	-1.44018	-1.31392	10.0306	0.74411	0.0796912	0.0528672	-1.40865
TEMORA-2	2018-11-01 14:40:58	0.282639	1.65833e-05	-1.44348	-1.31693	10.834	1.35582	0.161084	0.0891818	-1.35816
TEMORA-2	2018-11-01 14:52:20	0.282656	1.51113e-05	-1.43847	-1.31236	12.5353	0.726645	0.0881023	0.0410134	-0.754418
TEMORA-2	2018-11-01 15:03:26	0.282663	1.59164e-05	-1.44999	-1.32287	11.2609	0.979474	0.119027	0.06157	-0.500852
TEMORA-2	2018-11-01 16:36:35	0.282726	2.54611e-05	-1.31581	-1.18387	8.39392	0.898028	0.0845758	0.0755309	1.71972
TEMORA-2	2018-11-01 16:46:44	0.282673	1.98186e-05	-1.44169	-1.29712	10.0603	1.17648	0.127856	0.0831599	-0.130604
TEMORA-2	2018-11-01 16:57:49	0.282731	1.79626e-05	-1.44834	-1.30311	8.60422	0.737186	0.0814515	0.0608508	1.919
TEMORA-2	2018-11-01 17:08:54	0.282707	1.93032e-05	-1.45395	-1.30815	8.20664	0.639023	0.0714601	0.055507	1.04572
TEMORA-2	2018-11-01 17:19:59	0.282713	2.13617e-05	-1.44796	-1.30276	7.81356	0.58138	0.0638399	0.0529375	1.28771
TEMORA-2	2018-11-01 17:31:22	0.282654	2.42161e-05	-1.47497	-1.32706	6.36207	0.335751	0.039202	0.0376016	-0.815333
TEMORA-2	2018-11-02 08:58:54	0.28267	1.98719e-05	-1.44899	-1.29804	8.83178	0.576768	0.0866484	0.0460942	-0.237269
TEMORA-2	2018-11-02 09:09:14	0.282652	2.26548e-05	-1.49116	-1.3358	7.58479	0.29005	0.0430705	0.027227	-0.894267
TEMORA-2	2018-11-02 09:27:56	0.282728	2.80035e-05	-1.52761	-1.36846	5.10649	0.637056	0.0898565	0.0886532	1.79985
TEMORA-2	2018-11-02 09:39:13	0.282684	2.76088e-05	-1.53183	-1.37224	4.93434	0.289994	0.0503224	0.0417334	0.259576
TEMORA-2	2018-11-02 09:52:23	0.282635	3.13395e-05	-1.53009	-1.37069	4.38051	0.352358	0.066632	0.0571228	-1.49981
TEMORA-2	2018-11-02 14:35:46	0.282678	1.59909e-05	-1.44955	-1.33982	9.23115	0.36087	0.0426336	0.0276819	0.0452435
TEMORA-2	2018-11-02 14:47:47	0.282695	2.03024e-05	-1.47086	-1.35952	7.5273	0.294137	0.0442127	0.0283248	0.648528
TEMORA-2	2018-11-02 14:59:48	0.282646	2.09257e-05	-1.46818	-1.35704	8.26558	0.75618	0.0917287	0.0656615	-1.08999
TEMORA-2	2018-11-02 15:11:50	0.282721	1.857e-05	-1.47045	-1.35914	8.26475	0.523099	0.0616368	0.044217	1.56094
TEMORA-2	2018-11-02 15:23:51	0.282687	1.59887e-05	-1.47174	-1.36034	10.3462	0.880302	0.102538	0.0604688	0.338774
TEMORA-2	2018-11-02 15:35:52	0.282638	1.91687e-05	-1.48477	-1.37238	7.93688	0.6558	0.0729813	0.058663	-1.37868
TEMORA-2	2018-11-02 17:04:34	0.282637	3.13247e-05	-1.4874	-1.36595	4.22806	0.132442	0.0165411	0.0222996	-1.39923
TEMORA-2	2018-11-02 17:16:35	0.282645	1.62436e-05	-1.45753	-1.33852	10.1923	0.718758	0.0732038	0.0498919	-1.12197
TEMORA-2	2018-11-02 17:25:51	0.282722	1.90826e-05	-1.45567	-1.33681	8.09315	0.727922	0.0748258	0.0639133	1.58165
TEMORA-2	2018-11-02 17:35:06	0.282656	2.81377e-05	-1.46617	-1.34645	7.00429	0.261816	0.032212	0.0262531	-0.727874
TEMORA-2	2018-11-02 18:51:09	0.282693	2.0412e-05	-1.43367	-1.32209	8.48869	1.16675	0.111837	0.0972527	0.55353
TEMORA-2	2018-11-02 19:08:04	0.282675	1.93897e-05	-1.44946	-1.33665	8.13358	1.05355	0.107401	0.0916974	-0.0789476
TEMORA-2	2018-11-02 19:24:59	0.282665	2.0493e-05	-1.45469	-1.34147	9.1321	1.40687	0.145546	0.111235	-0.441723
TEMORA-2	2018-11-02 19:41:56	0.282669	1.7998e-05	-1.46657	-1.35243	9.4015	0.395661	0.0425696	0.0293793	-0.281134
TEMORA-2	2018-11-02 20:08:00	0.282672	2.11397e-05	-1.46729	-1.35309	9.90419	0.941183	0.0997614	0.0674726	-0.169382
TEMORA-2	2018-11-02 20:23:05	0.282671	2.00357e-05	-1.47068	-1.35622	8.03509	0.865899	0.0889574	0.0761991	-0.223135
TEMORA-2	2018-11-06 18:06:28	0.282666	1.95547e-05	-1.34944	-1.23851	8.00402	0.412804	0.0345561	0.0366882	-0.400217
TEMORA-2	2018-11-06 18:13:58	0.282708	2.83791e-05	-1.33684	-1.22695	5.0059	0.280052	0.0278939	0.0397786	1.10957
TEMORA-2	2018-11-06 18:15:49	0.282691	1.77679e-05	-1.32957	-1.22028	10.1531	0.369005	0.0350904	0.0257338	0.510013
TEMORA-2	2018-11-06 18:26:04	0.282694	1.5671e-05	-1.33328	-1.22368	8.5956	0.940777	0.081979	0.0780419	0.594087
TEMORA-2	2018-11-07 09:14:36	0.282657	1.45813e-05	-1.43741	-1.29846	12.7743	1.20501	0.145164	0.0671087	-0.720729
TEMORA-2	2018-11-07 09:38:21	0.282676	1.49695e-05	-1.45156	-1.31125	13.412	0.816847	0.110683	0.043531	-0.0449593
TEMORA-2	2018-11-07 10:01:11	0.282697	1.68832e-05	-1.46408	-1.32256	10.0741	0.743275	0.100967	0.0524988	0.700471
TEMORA-2	2018-11-07 10:24:56	0.282702	2.0569e-05	-1.4754	-1.33278	8.55087	0.734476	0.100032	0.0614925	0.887127
TEMORA-2	2018-11-07 12:13:56	0.282679	1.67893e-05	-1.4998	-1.35926	9.19012	0.593202	0.0787873	0.0456876	0.0631176
TEMORA-2	2018-11-07 12:36:12	0.282698	2.02779e-05	-1.51551	-1.37349	8.24442	0.65338	0.0915144	0.0562609	0.743054
TEMORA-2	2018-11-07 12:58:54	0.282681	2.24464e-05	-1.52653	-1.38349	7.39308	0.372344	0.0535515	0.0357943	0.148018
TEMORA-2	2018-11-07 13:21:42	0.282675	1.97614e-05	-1.53144	-1.38793	7.39636	0.320276	0.0437552	0.0305288	-0.0592518
TEMORA-2	2018-11-07 13:44:42	0.282663	2.28122e-05	-1.5216	-1.37902	6.63665	0.498478	0.0658048	0.0534194	-0.485729
TEMORA-2	2018-11-07 15:27:40	0.282652	1.99615e-05	-1.5383	-1.42803	7.4278	0.282497	0.0416662	0.0269962	-0.874577
TEMORA-2	2018-11-07 15:47:22	0.282679	1.95043e-05	-1.52658	-1.41714	6.5918	0.456133	0.0627828	0.0490634	0.0784683
TEMORA-2	2018-11-07 15:57:49	0.282656	2.13995e-05	-1.53233	-1.42249	7.79408	0.389113	0.0603208	0.0358693	-0.72795
TEMORA-2	2018-11-07 19:17:15	0.282647	2.20489e-05	-1.44525	-1.33336	8.11908	1.45003	0.140299	0.12703	-1.05308
TEMORA-2	2018-11-07 19:45:18	0.282681	2.05076e-05	-1.44535	-1.33344	9.15894	1.47704	0.147183	0.114485	0.156504
TEMORA-2	2018-11-07 19:56:35	0.282689	2.09323e-05	-1.42606	-1.31565	8.70861	1.37364	0.127519	0.112338	0.4179
TEMORA-2	2018-11-25 13:17:10	0.282675	1.50393e-05	-1.27714	-1.15577	13.1861	1.43533	0.184252	0.0769341	-0.0688812
TEMORA-2	2018-11-25 14:09:32	0.282648	1.4427e-05	-1.29625	-1.17307	11.5878	0.483055	0.0646846	0.0294943	-1.0091
TEMORA-2	2018-11-25 14:52:11	0.28264	1.84346e-05	-1.3079	-1.18362	10.2623	0.874377	0.131465	0.060275	-1.32218
TEMORA-2	2018-12-07 13:18:19	0.282717	2.73952e-05	-1.09964	-0.973442	7.9266	0.551074	0.0733588	0.0489301	1.41127
TEMORA-2	2018-12-07 14:06:31	0.282662	2.08637e-05	-1.06516	-0.942919	8.00937	0.466212	0.0632432	0.0410525	-0.523545
TEMORA-2	2018-12-25 09:52:04	0.2827	1.76258e-05	-1.31537	-1.1919	10.5934	0.789012	0.0979755	0.0526865	0.820286
TEMORA-2	2018-12-25 09:57:35	0.282725	1.55769e-05	-1.31635	-1.1928	11.0442	0.494635	0.0667724	0.0316977	1.69139
TEMORA-2	2018-12-25 10:03:06	0.282633	1.84361e-05	-1.31553	-1.19205	9.72928	0.408648	0.0578958	0.0297353	-1.55453
TEMORA-2	2018-12-25 10:08:38	0.282678	1.90041e-05	-1.29756	-1.17577	9.07314	0.511796	0.0669463	0.0400402	0.0246239
TEMORA-2	2018-12-25 10:14:08	0.282711	1.84601e-05	-1.28822	-1.16731	9.54244	0.564319	0.0749634	0.0420714	1.19807
