# Supplementary material for: A new practical isobaric interference correction model for thein situHf isotopic analysis using laser ablation-multi-collector-ICP-mass spectrometry of zircons with high Yb/Hf ratios
Source: Royal Society of Chemistry journal article supplement (doi:10.1039/c9ja00024k), 2019-01-01
Supplement: c9ja00024k6.xlsx [file c9ja00024k6.xlsx]

## Sheet: SMPs
No	Sample	SpotSize	PulseRate	176Hf/177Hf	2SE	βHf	βYb	HfBeam	YbBeam	LuBeam	180Hf	172Yb	176Yb/177Hf	176Lu/177Hf	2SE	(βYb/βHf)c	εRef.Value
1	QH-55-10HZ	55	10	0.282975	1.62669e-05	-1.30981	-1.17947	16.9534	0.651357	0.0817408	4.25192	0.141696	0.0271997	0.000675569	5.08675e-06	0.9	-0.748377
2	QH-55-8HZ	55	8	0.283003	1.89119e-05	-1.29508	-1.16621	13.5256	0.600238	0.0753509	3.39222	0.130576	0.0313936	0.000780833	1.58465e-05	0.9	0.230608
3	QH-55-6HZ	55	6	0.283023	1.91692e-05	-1.30751	-1.1774	10.0545	0.383434	0.0469954	2.52166	0.0834122	0.027022	0.000654684	4.94528e-06	0.9	0.960273
4	QH-55-4HZ	55	4	0.282992	3.1729e-05	-1.30312	-1.17345	6.60284	0.362361	0.0409846	1.65599	0.078828	0.0389661	0.000866725	1.59583e-05	0.9	-0.146241
5	QH-55-3HZ	55	3	0.282954	3.28832e-05	-1.28672	-1.15868	4.83939	0.249502	0.0274822	1.21372	0.0542767	0.0365032	0.00079078	2.30502e-05	0.9	-1.47932
6	QH-55-2HZ	55	2	0.282993	5.20187e-05	-1.30878	-1.17855	3.47049	0.18811	0.0204572	0.870399	0.0409214	0.0388491	0.000833747	4.92561e-05	0.9	-0.0932509
7	QH-55-1HZ	55	1	0.28297	0.000173342	-1.28511	-1.15724	1.40183	0.108942	0.00981439	0.351578	0.0236993	0.0548578	0.000979947	8.09708e-06	0.9	-0.92204
8	QH-40-10HZ	40	10	0.282981	2.14395e-05	-1.32085	-1.18942	10.1166	0.571881	0.0706463	2.53725	0.124407	0.0397811	0.00097178	5.4023e-05	0.9	-0.529633
9	QH-40-8HZ	40	8	0.283009	2.28602e-05	-1.32218	-1.19061	7.89779	0.489903	0.0574455	1.98077	0.106573	0.0436224	0.00101498	4.9516e-05	0.9	0.469269
10	QH-40-7HZ	40	7	0.282996	2.7208e-05	-1.31861	-1.1874	7.19854	0.339107	0.0410429	1.80539	0.0737694	0.0334915	0.000799742	2.48993e-05	0.9	0.00684315
11	QH-40-6HZ	40	6	0.283003	3.06e-05	-1.31401	-1.18326	6.19864	0.313707	0.0375508	1.55462	0.0682437	0.0362351	0.00085332	3.33574e-05	0.9	0.242565
12	QH-40-4HZ	40	4	0.28303	3.95076e-05	-1.30331	-1.17362	4.06593	0.183108	0.0213881	1.01973	0.0398333	0.0322384	0.000738635	7.3258e-06	0.9	1.2104
13	QH-40-3HZ	40	3	0.28295	4.96812e-05	-1.29876	-1.16952	2.97172	0.123616	0.0133701	0.745308	0.0268914	0.0296693	0.00062994	4.25858e-06	0.9	-1.61102
14	QH-40-2HZ	40	2	0.283029	8.08711e-05	-1.28464	-1.15681	1.96062	0.0860945	0.00889363	0.491724	0.018729	0.0312474	0.000636629	9.01758e-06	0.9	1.16376
15	QH-30-10HZ	30	10	0.283007	3.658e-05	-1.33235	-1.19977	5.07712	0.138141	0.0182466	1.27334	0.0300512	0.0192876	0.000504563	8.27598e-06	0.9	0.38417
16	QH-30-8HZ	30	8	0.283015	3.60052e-05	-1.34056	-1.20717	3.98903	0.125131	0.0156155	1.00045	0.0272209	0.0223027	0.000548505	2.27956e-06	0.9	0.683484
17	QH-30-6HZ	30	6	0.282969	4.62655e-05	-1.34097	-1.20754	2.9601	0.0932301	0.0113648	0.742392	0.0202813	0.0226099	0.00054008	9.39174e-06	0.9	-0.967474
18	QH-30-4HZ	30	4	0.282945	6.3988e-05	-1.32216	-1.1906	2.34577	0.0938374	0.0103023	0.588319	0.0204134	0.0284959	0.000615501	3.85392e-06	0.9	-1.79136
19	QH-30-3HZ	30	3	0.282947	8.54162e-05	-1.32599	-1.19404	1.60849	0.0739895	0.00772324	0.403409	0.0160957	0.0328922	0.000672554	5.60631e-06	0.9	-1.74894
21	PL-55-10HZ	55	10	0.282947	2.1669e-05	-1.32539	-1.1935	9.03688	0.175333	0.0201192	2.26645	0.0381419	0.0136998	0.000311945	9.94369e-07	0.9	1.44156
22	PL-55-8HZ	55	8	0.282862	1.78486e-05	-1.3011	-1.17163	8.25496	0.162321	0.0185287	2.07034	0.0353112	0.0138991	0.000314393	9.71829e-07	0.9	-1.54051
23	PL-55-6HZ	55	6	0.282909	3.50904e-05	-1.30687	-1.17683	5.76148	0.119415	0.0129994	1.44498	0.0259776	0.0147161	0.000316036	1.27971e-06	0.9	0.102662
24	PL-55-4HZ	55	4	0.282947	4.14618e-05	-1.3069	-1.17685	3.97985	0.0843321	0.00899188	0.998146	0.0183456	0.0150142	0.000316419	1.95808e-06	0.9	1.4436
25	PL-55-3HZ	55	3	0.282965	4.97495e-05	-1.31256	-1.18195	2.99874	0.0650491	0.00682974	0.752084	0.0141508	0.0153864	0.000319031	2.32002e-06	0.9	2.09546
26	PL-55-2HZ	55	2	0.282935	6.98071e-05	-1.28997	-1.16161	1.92154	0.043001	0.00426196	0.481923	0.00935443	0.0158395	0.000310613	4.2001e-06	0.9	1.00967
27	PL-55-1HZ	55	1	0.283205	0.000198923	-1.29381	-1.16507	0.872993	0.0203473	0.00194104	0.218947	0.00442635	0.0164972	0.000311347	8.766e-06	0.9	10.5749
28	PL-40-10HZ	40	10	0.28294	3.0972e-05	-1.32506	-1.19321	5.64257	0.107996	0.0121588	1.41516	0.0234934	0.0136008	0.000301728	1.78275e-06	0.9	1.19044
29	PL-40-8HZ	40	8	0.282921	2.94686e-05	-1.30603	-1.17607	4.55386	0.0884806	0.00977149	1.14211	0.0192481	0.0138266	0.000300422	1.85676e-06	0.9	0.546844
30	PL-40-6HZ	40	6	0.282879	4.47081e-05	-1.30611	-1.17614	3.53022	0.0705828	0.00753822	0.88538	0.0153546	0.0142426	0.000298971	1.89667e-06	0.9	-0.963617
31	PL-40-4HZ	40	4	0.282942	6.54093e-05	-1.30225	-1.17267	2.27244	0.0473365	0.00487221	0.569929	0.0102976	0.0148414	0.000300177	3.31186e-06	0.9	1.28885
32	PL-40-3HZ	40	3	0.282983	7.73352e-05	-1.31788	-1.18675	1.65129	0.0354715	0.00354259	0.414142	0.00771646	0.0152622	0.000300393	4.05924e-06	0.9	2.71434
33	PL-40-2HZ	40	2	0.282776	0.000117711	-1.27285	-1.1462	1.05341	0.0232214	0.00227316	0.264196	0.00505159	0.0156015	0.000302249	6.24388e-06	0.9	-4.60367
34	PL-30-10HZ	30	10	0.282931	5.07413e-05	-1.33968	-1.20638	2.83283	0.0494676	0.00576641	0.710474	0.0107612	0.0123491	0.000285201	2.69266e-06	0.9	0.882549
35	PL-30-8HZ	30	8	0.282951	6.57975e-05	-1.32675	-1.19473	2.16164	0.0392689	0.00435972	0.542139	0.00854256	0.0128815	0.000282433	3.0849e-06	0.9	1.57967
36	PL-30-6HZ	30	6	0.28282	7.74305e-05	-1.34319	-1.20954	1.73153	0.0326397	0.00348021	0.434268	0.00710045	0.0134158	0.000281447	4.52041e-06	0.9	-3.04114
37	PL-30-4HZ	30	4	0.28284	0.000106985	-1.31737	-1.18629	1.11899	0.0222291	0.00216054	0.280644	0.00483572	0.0141147	0.000269977	6.98982e-06	0.9	-2.33495
38	PL-30-3HZ	30	3	0.283135	0.000231572	-1.31608	-1.18512	0.510657	0.0109418	0.00101673	0.128073	0.00238028	0.0151727	0.000278625	1.53583e-05	0.9	8.10741
